# Supplementary material for: Sampbenzophenones A–G, prenylated benzoylphloroglucinol derivatives from Hypericum sampsonii
Source: Royal Society of Chemistry journal article supplement (doi:10.1039/c6ra17885e), 2016-01-01

## **Sampbenzophenones A–G, prenylated benzoylphloroglucinol derivatives from *Hypericum sampsonii*†**

Hucheng Zhu,<sup>‡a</sup> Chunmei Chen,<sup>‡a</sup> Dongdong Tan,<sup>a</sup> Dongyan Li,<sup>b</sup> Yi Guo,<sup>a</sup> Guangzheng Wei,<sup>a</sup> Jinwen Zhang,<sup>b</sup> Jianping Wang,<sup>a</sup> Zengwei Luo,<sup>a</sup> Yongbo Xue<sup>\*a</sup> and Yonghui Zhang<sup>\*a</sup>

<sup>a</sup> *Hubei Key Laboratory of Natural Medicinal Chemistry and Resource Evaluation, School of Pharmacy, Tongji Medical College, Huazhong University of Science and Technology, Wuhan 430030, China*

<sup>b</sup> *Tongji Hospital Affiliated to Tongji Medical College, Huazhong University of Science and Technology, Wuhan 430030, China*

<sup>c</sup> *State Key Laboratory of Phytochemistry and Plant Resources in West China, Kunming Institute of Botany, Chinese Academy of Sciences, Kunming 650204, China*

### **\* Corresponding Authors**

\* Tel./fax: +86-027-83692892

Emails: zhangyh@mails.tjmu.edu.cn (Y.Z.);

yongboxue@mail.hust.edu.cn (Y.X.)

## CONTENTS

|                                                                |    |
|----------------------------------------------------------------|----|
| HRESIMS of compound <b>1</b> .....                             | 1  |
| UV spectrum of compound <b>1</b> .....                         | 1  |
| IR spectrum of compound <b>1</b> .....                         | 2  |
| <sup>1</sup> H NMR of compound <b>1</b> .....                  | 2  |
| <sup>13</sup> C NMR and DEPT of compound <b>1</b> .....        | 3  |
| HSQC of compound <b>1</b> .....                                | 3  |
| HMBC of compound <b>1</b> .....                                | 4  |
| <sup>1</sup> H- <sup>1</sup> H COSY of compound <b>1</b> ..... | 4  |
| NOESY of compound <b>1</b> .....                               | 5  |
| HRESIMS of compound <b>2</b> .....                             | 5  |
| UV spectrum of compound <b>2</b> .....                         | 6  |
| IR spectrum of compound <b>2</b> .....                         | 6  |
| <sup>1</sup> H NMR of compound <b>2</b> .....                  | 7  |
| <sup>13</sup> C NMR and DEPT of compound <b>2</b> .....        | 7  |
| HSQC of compound <b>2</b> .....                                | 8  |
| HMBC of compound <b>2</b> .....                                | 8  |
| <sup>1</sup> H- <sup>1</sup> H COSY of compound <b>2</b> ..... | 9  |
| NOESY of compound <b>2</b> .....                               | 9  |
| HRESIMS of compound <b>3</b> .....                             | 10 |
| UV spectrum of compound <b>3</b> .....                         | 10 |
| IR spectrum of compound <b>3</b> .....                         | 11 |
| <sup>1</sup> H NMR of compound <b>3</b> .....                  | 11 |
| <sup>13</sup> C NMR and DEPT of compound <b>3</b> .....        | 12 |
| HSQC of compound <b>3</b> .....                                | 12 |
| HMBC of compound <b>3</b> .....                                | 13 |
| <sup>1</sup> H- <sup>1</sup> H COSY of compound <b>3</b> ..... | 13 |
| NOESY of compound <b>3</b> .....                               | 14 |
| HRESIMS of compound <b>4</b> .....                             | 14 |

|                                                                |    |
|----------------------------------------------------------------|----|
| UV spectrum of compound <b>4</b> .....                         | 15 |
| IR spectrum of compound <b>4</b> .....                         | 15 |
| <sup>1</sup> H NMR of compound <b>4</b> .....                  | 16 |
| <sup>13</sup> C NMR and DEPT of compound <b>4</b> .....        | 16 |
| HSQC of compound <b>4</b> .....                                | 17 |
| HMBC of compound <b>4</b> .....                                | 17 |
| <sup>1</sup> H- <sup>1</sup> H COSY of compound <b>4</b> ..... | 18 |
| NOESY of compound <b>4</b> .....                               | 18 |
| HRESIMS of compound <b>5</b> .....                             | 19 |
| UV spectrum of compound <b>5</b> .....                         | 19 |
| IR spectrum of compound <b>5</b> .....                         | 20 |
| <sup>1</sup> H NMR of compound <b>5</b> .....                  | 20 |
| <sup>13</sup> C NMR and DEPT of compound <b>5</b> .....        | 21 |
| HSQC of compound <b>5</b> .....                                | 21 |
| HMBC of compound <b>5</b> .....                                | 22 |
| HRESIMS of compound <b>6</b> .....                             | 22 |
| UV spectrum of compound <b>6</b> .....                         | 23 |
| <sup>1</sup> H NMR of compound <b>6</b> .....                  | 23 |
| <sup>13</sup> C NMR and DEPT of compound <b>6</b> .....        | 24 |
| HSQC of compound <b>6</b> .....                                | 24 |
| HMBC of compound <b>6</b> .....                                | 25 |
| HRESIMS of compound <b>7</b> .....                             | 25 |
| UV spectrum of compound <b>7</b> .....                         | 26 |
| IR spectrum of compound <b>7</b> .....                         | 26 |
| <sup>1</sup> H NMR of compound <b>7</b> .....                  | 27 |
| <sup>13</sup> C NMR and DEPT of compound <b>7</b> .....        | 27 |
| HSQC of compound <b>7</b> .....                                | 28 |
| HMBC of compound <b>7</b> .....                                | 28 |
| <sup>1</sup> H- <sup>1</sup> H COSY of compound <b>7</b> ..... | 29 |

### HRESIMS of compound 1

Zh2-13-13 #22 RT: 0.31 AV: 1 NL: 7.20E7  
T: FTMS + p ESI Full ms [50.00-1500.00]

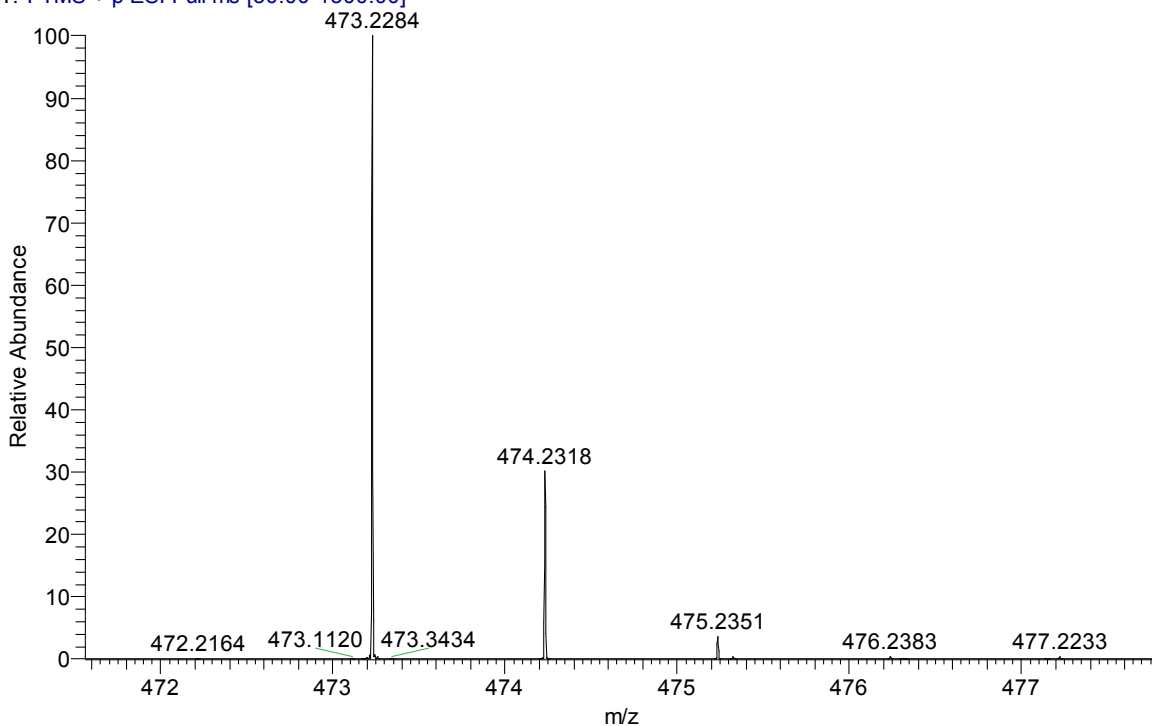

### UV spectrum of compound 1

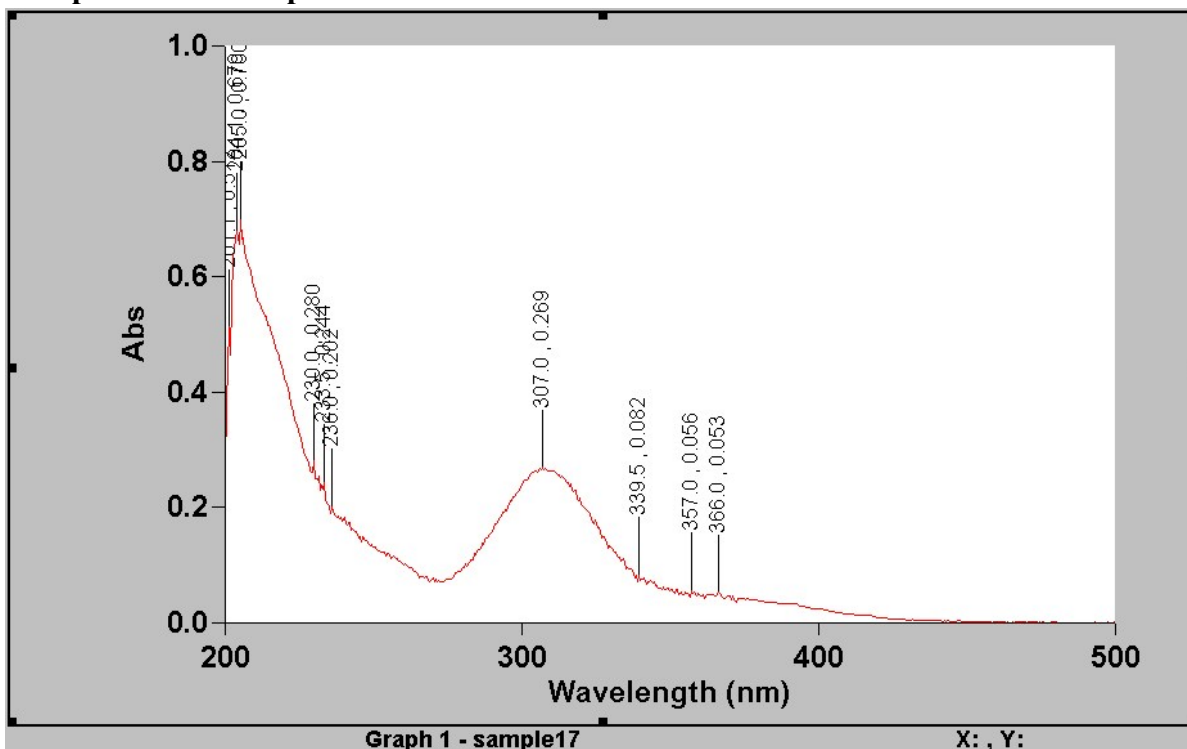

Graph 1 - sample17

X: , Y:



### <sup>13</sup>C NMR and DEPT of compound 1

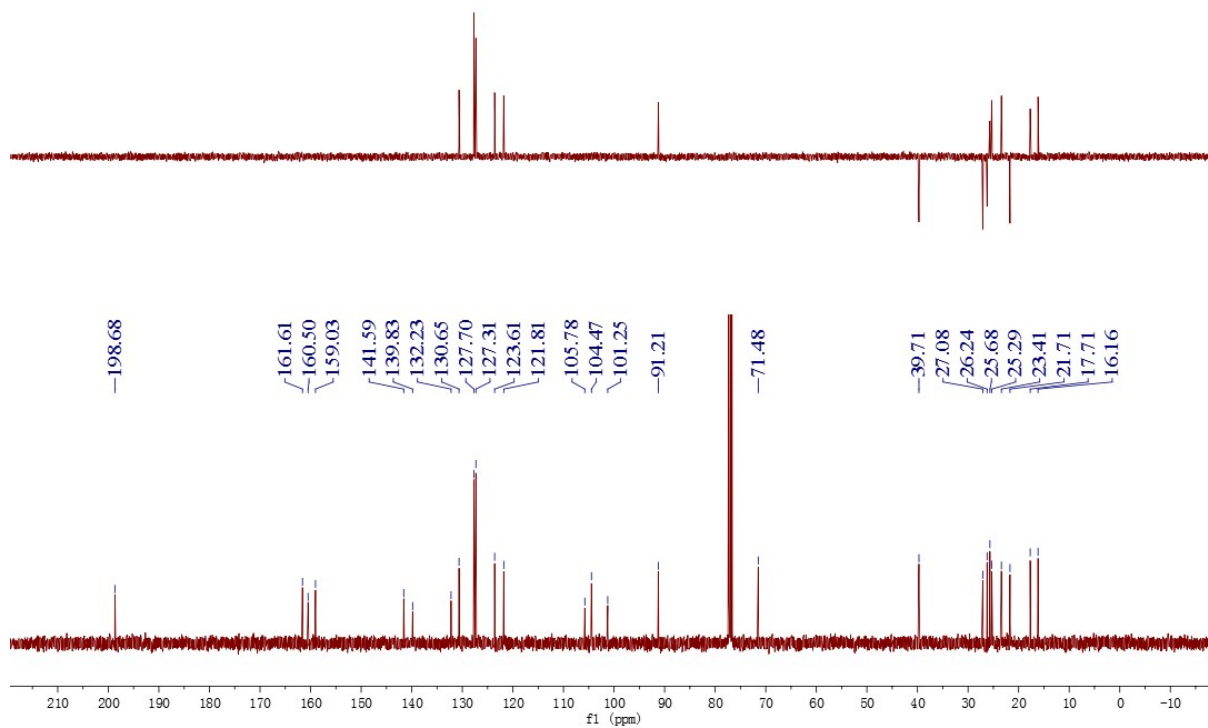

### HSQC of compound 1

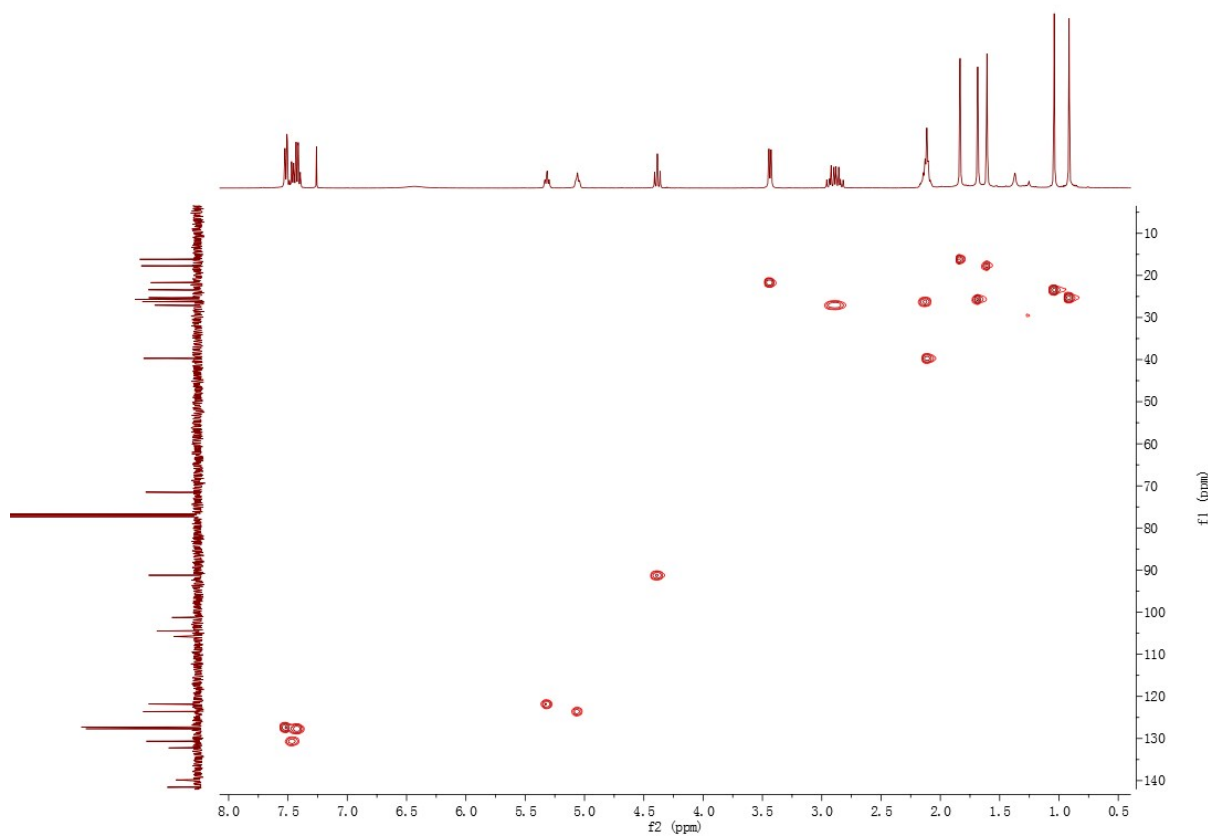

### HMBC of compound 1

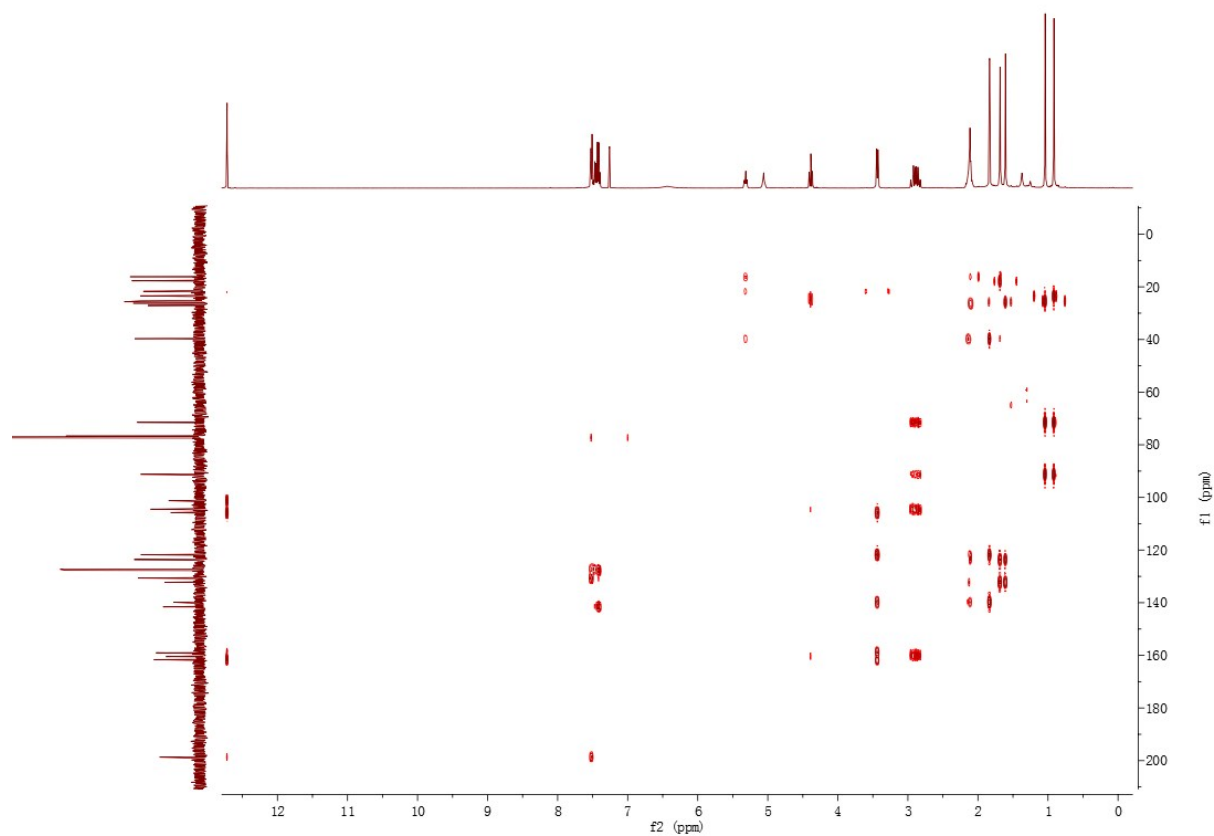

### <sup>1</sup>H-<sup>1</sup>H COSY of compound 1

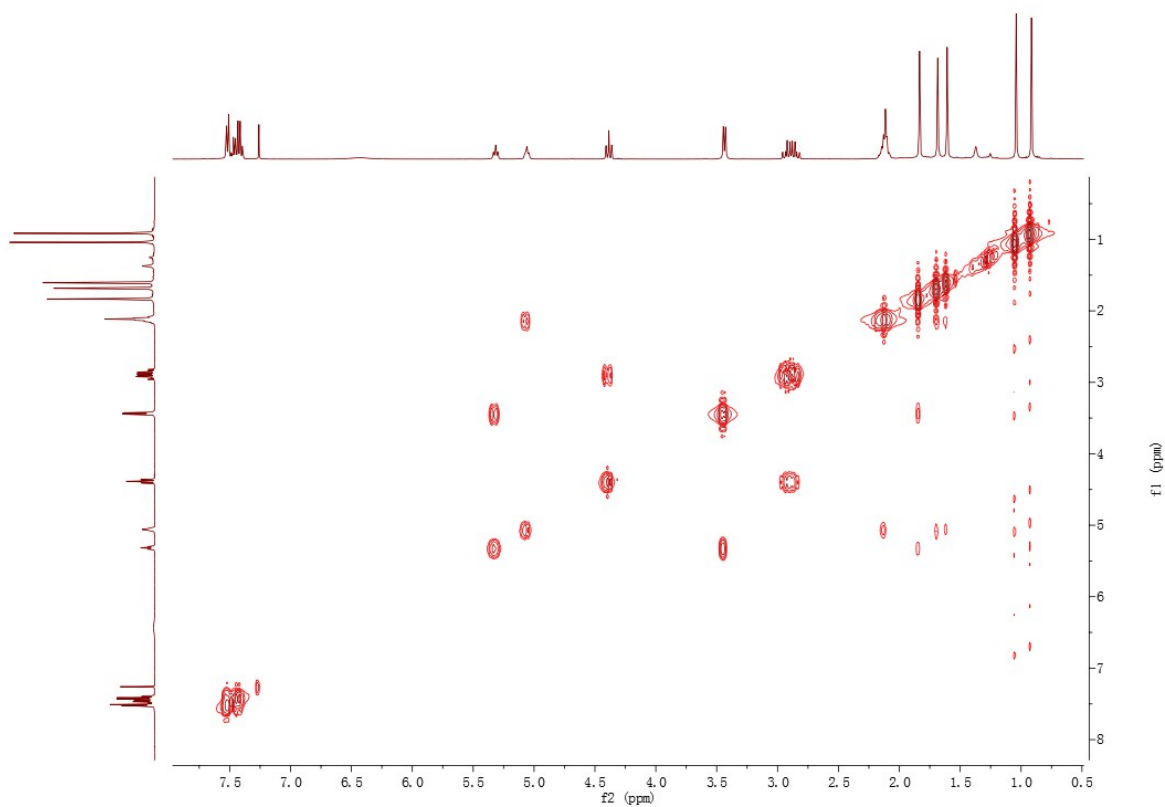

## NOESY of compound 1

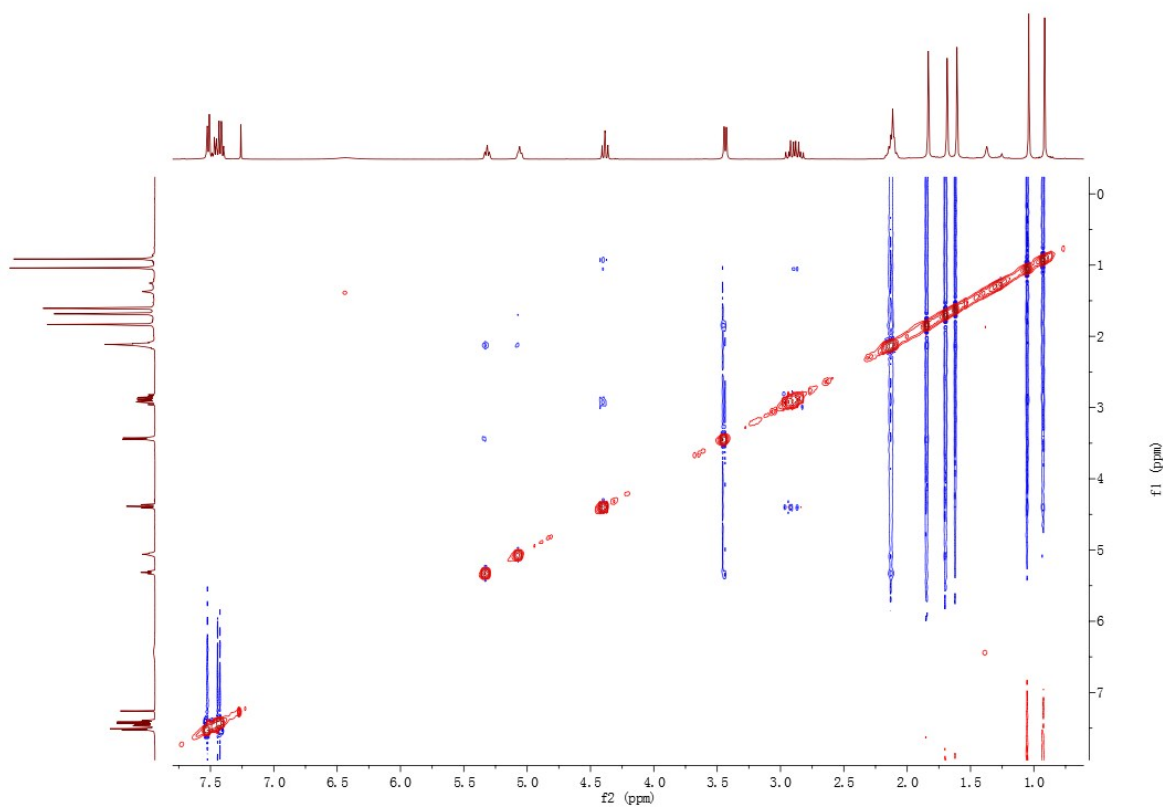

## HRESIMS of compound 2

Zh2-13-14 #23 RT: 0.32 AV: 1 NL: 3.16E6  
T: FTMS + p ESI Full ms [50.00-1500.00]

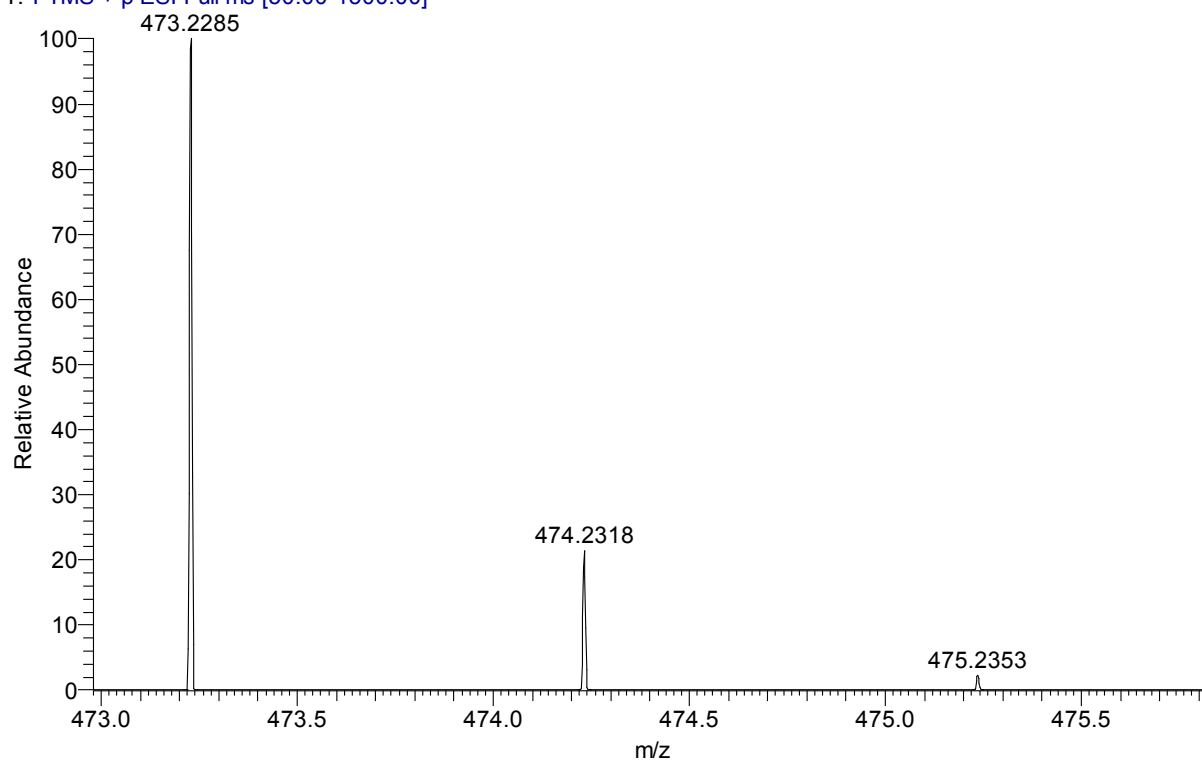



### UV spectrum of compound 2

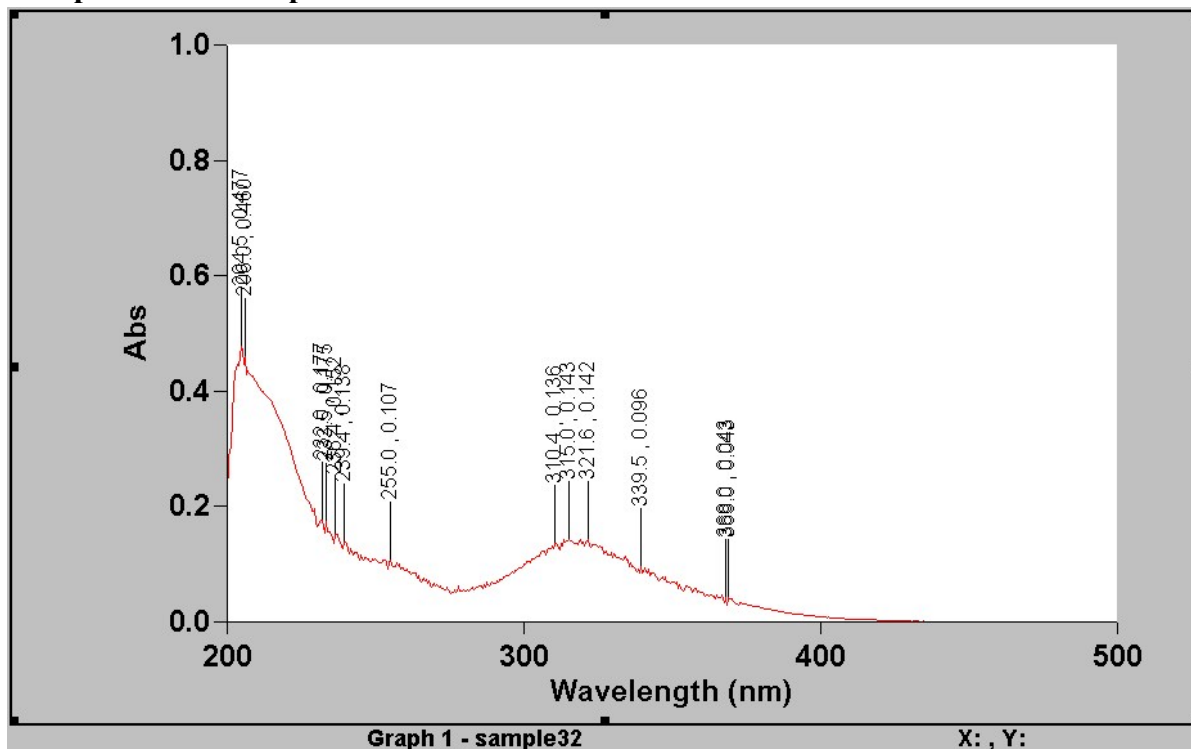

### IR spectrum of compound 2

E:\ \20130905\ZH2-13-14.0

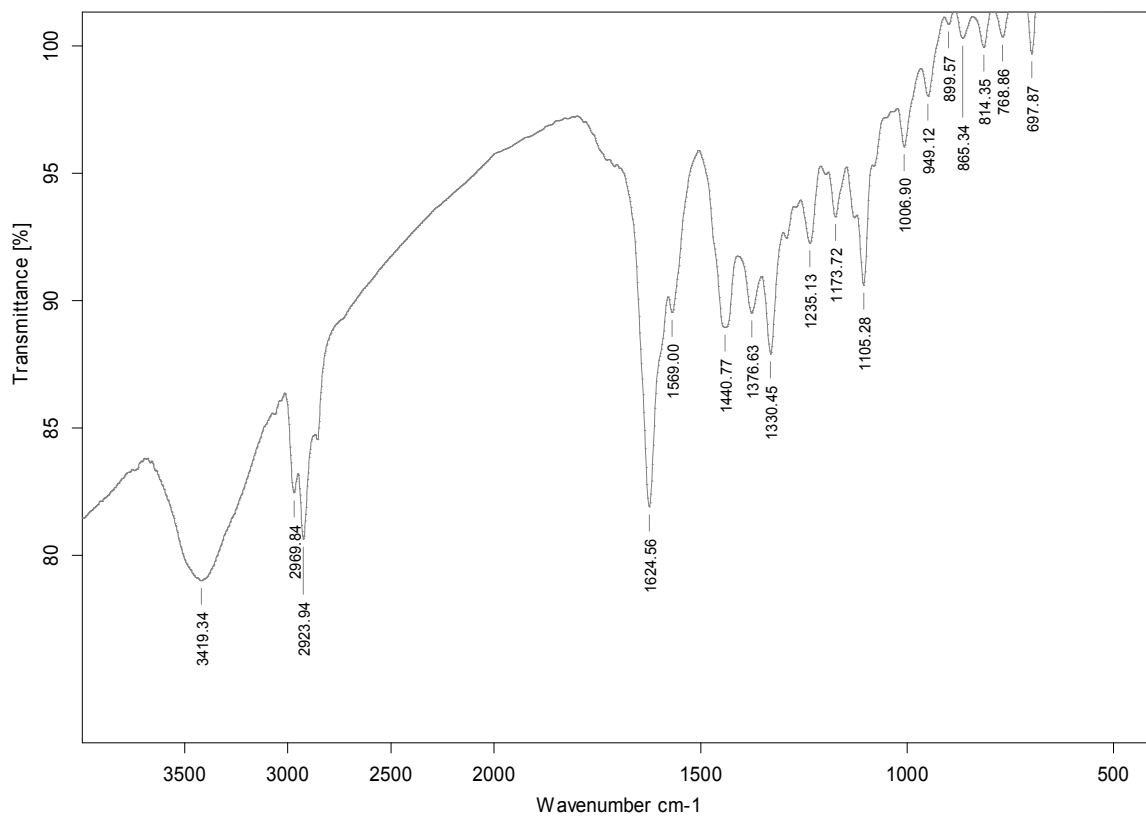

### <sup>1</sup>H NMR of compound 2

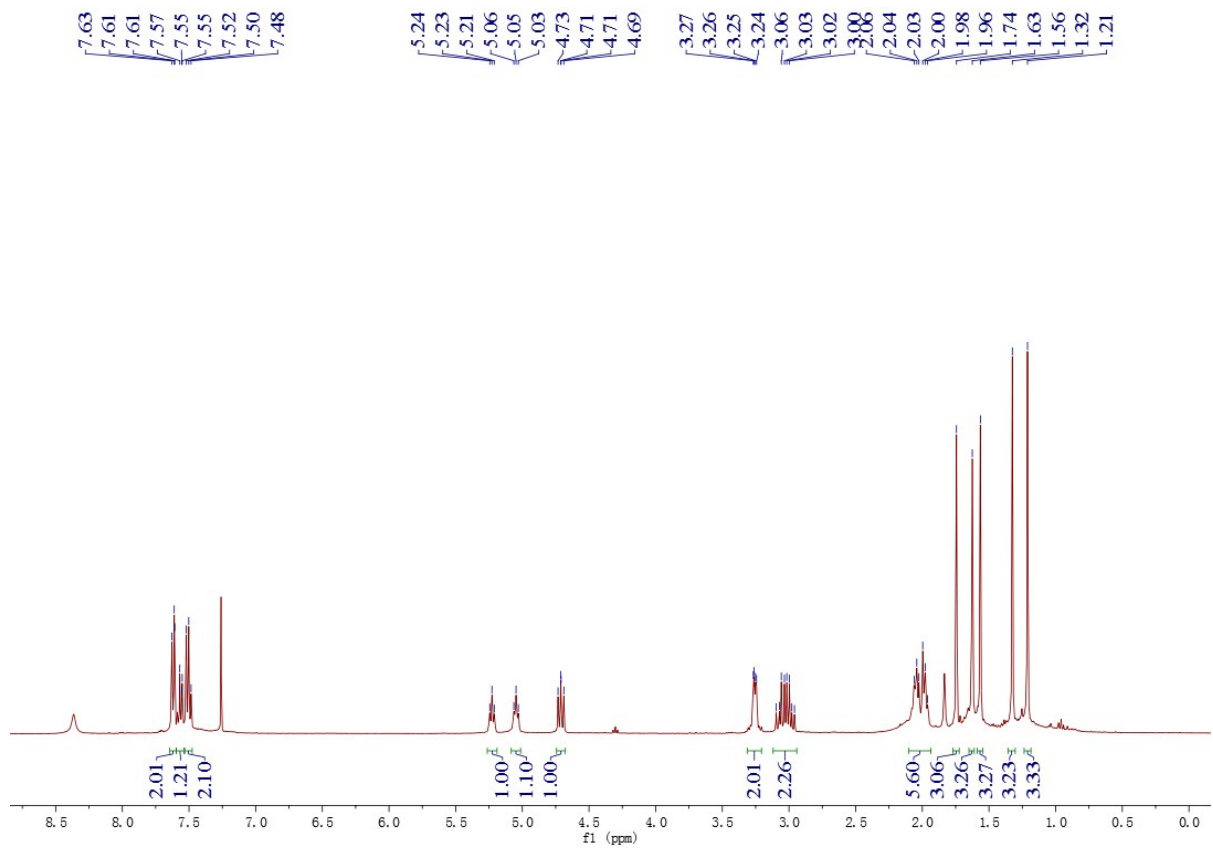

### <sup>13</sup>C NMR and DEPT of compound 2

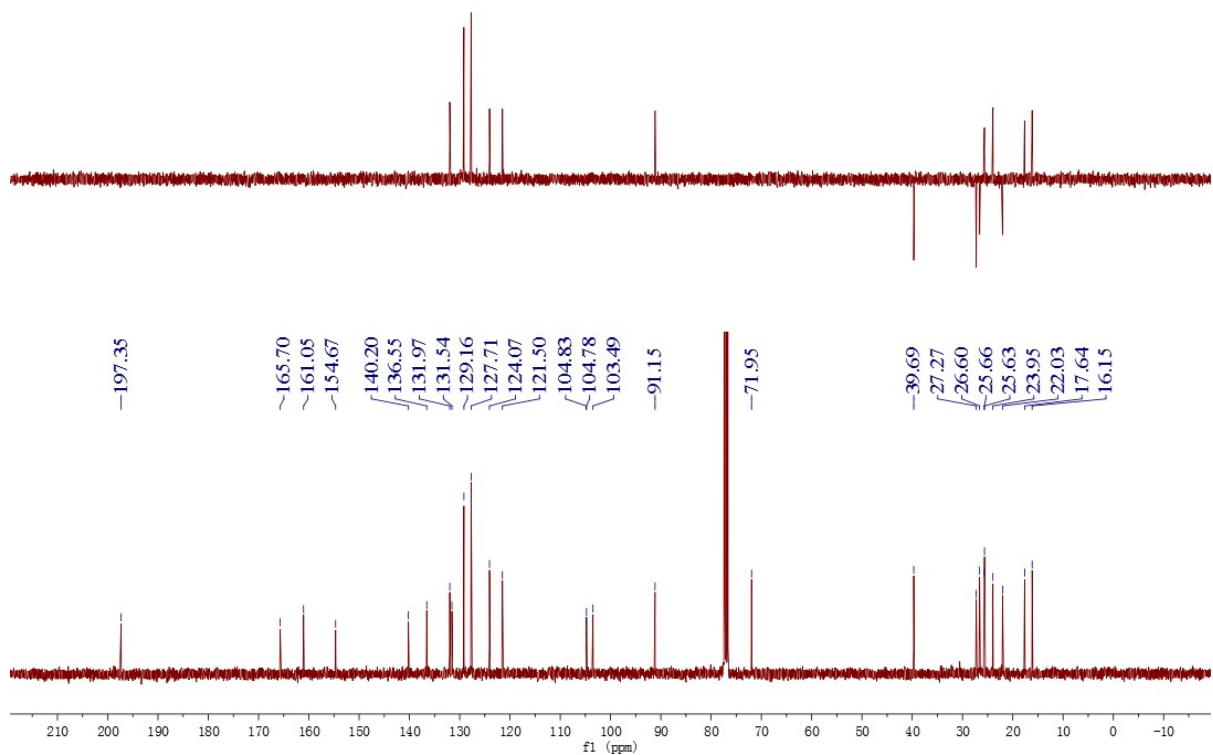

## HSQC of compound 2

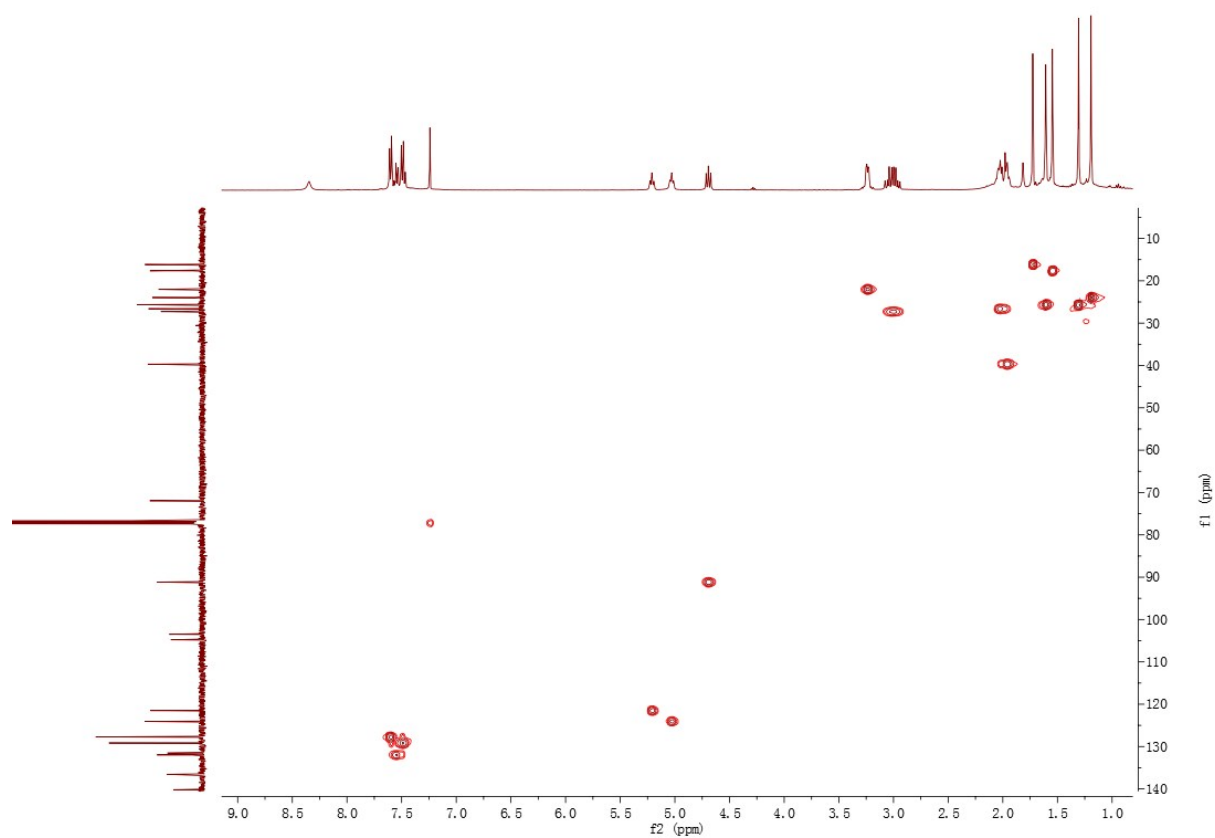

## HMBC of compound 2

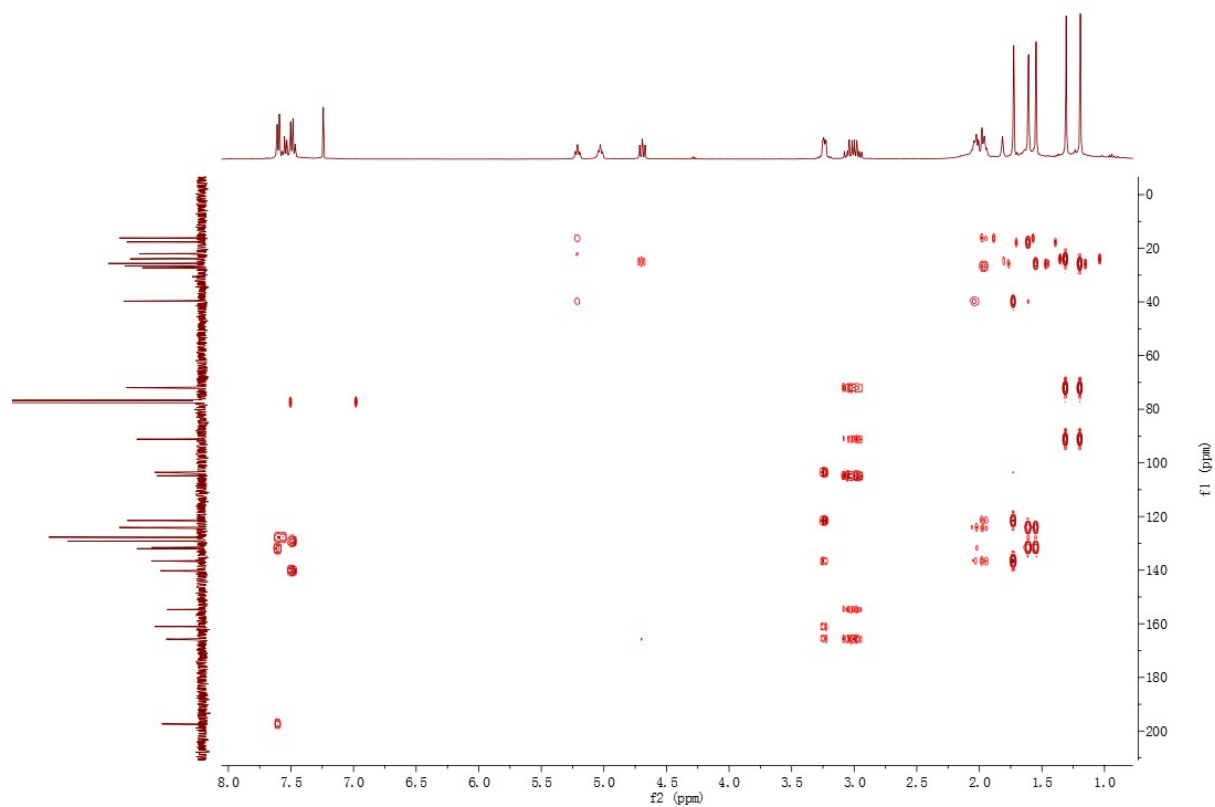

### $^1\text{H}$ - $^1\text{H}$ COSY of compound 2

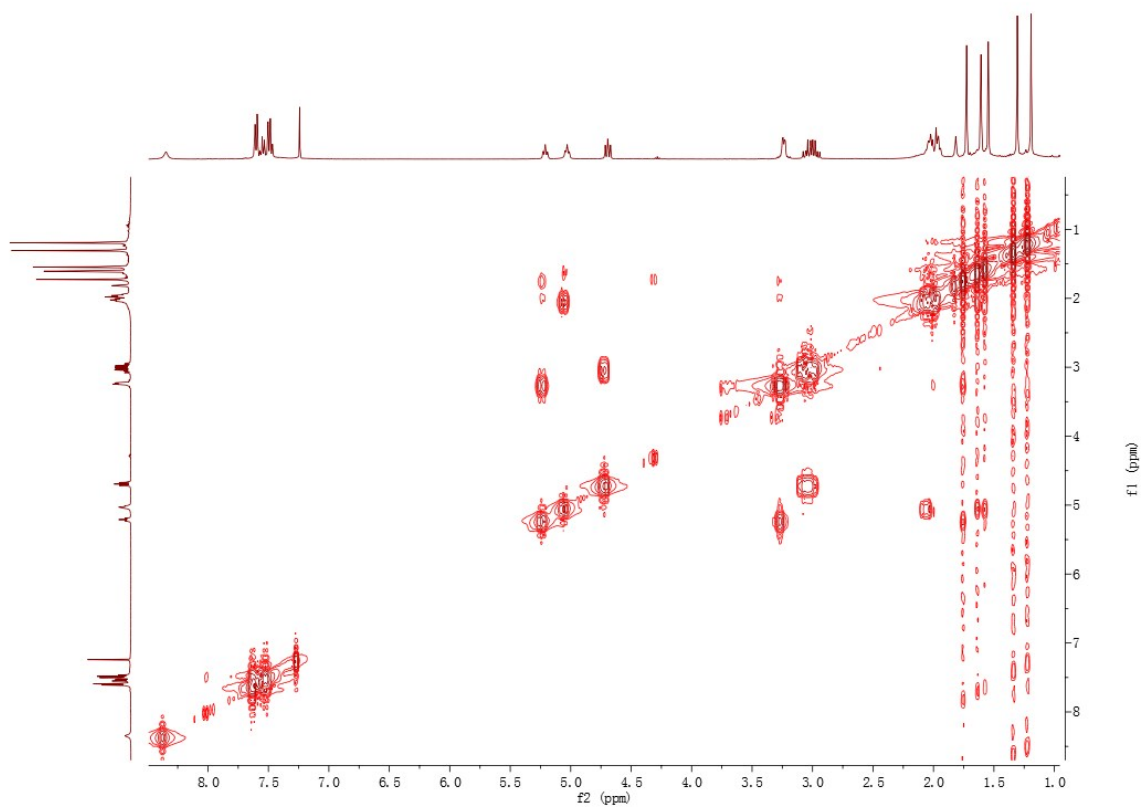

### NOESY of compound 2

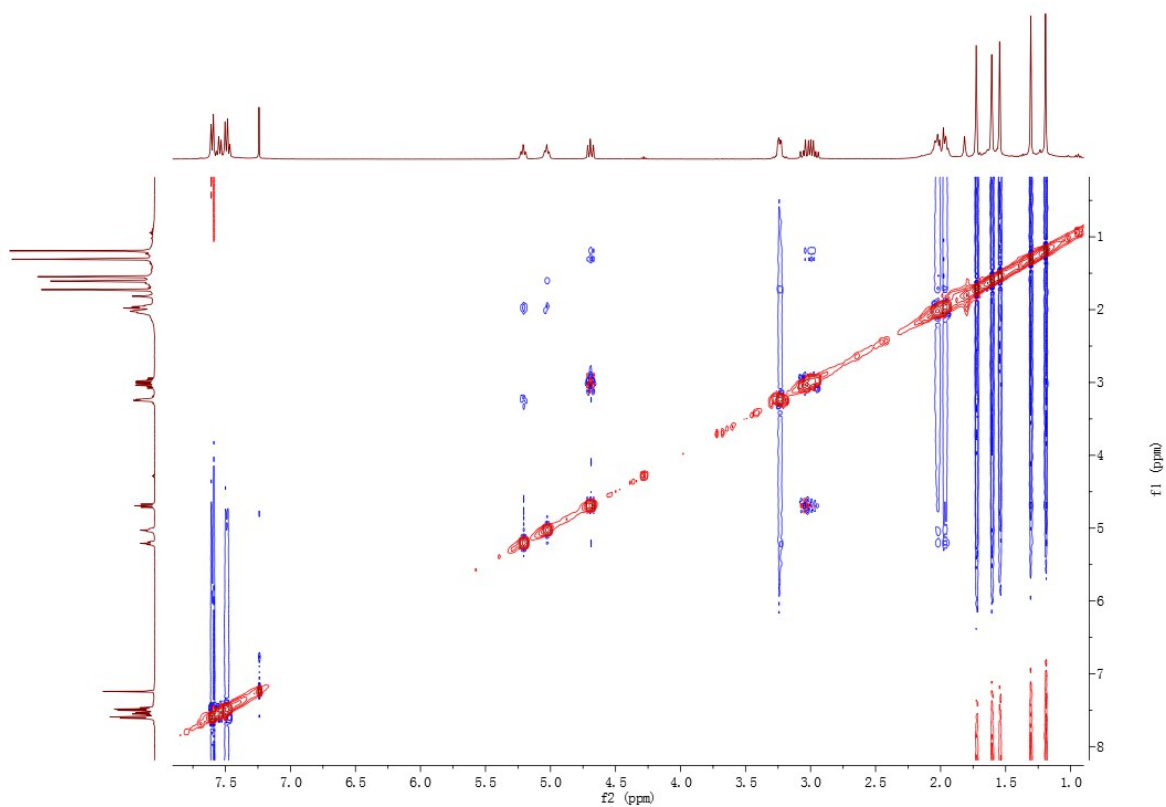

### HRESIMS of compound 3

Zh2-13-15 #19 RT: 0.26 AV: 1 NL: 5.91E6  
T: FTMS + p ESI Full ms [50.00-1500.00]

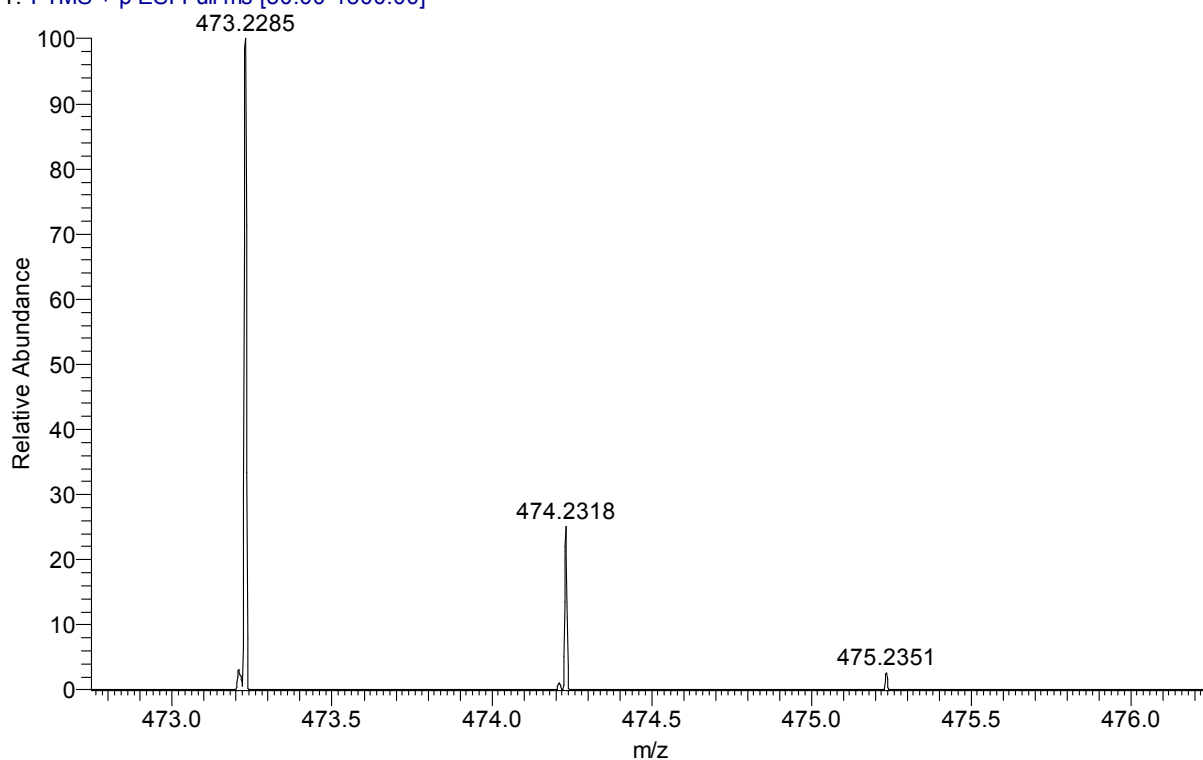

### UV spectrum of compound 3

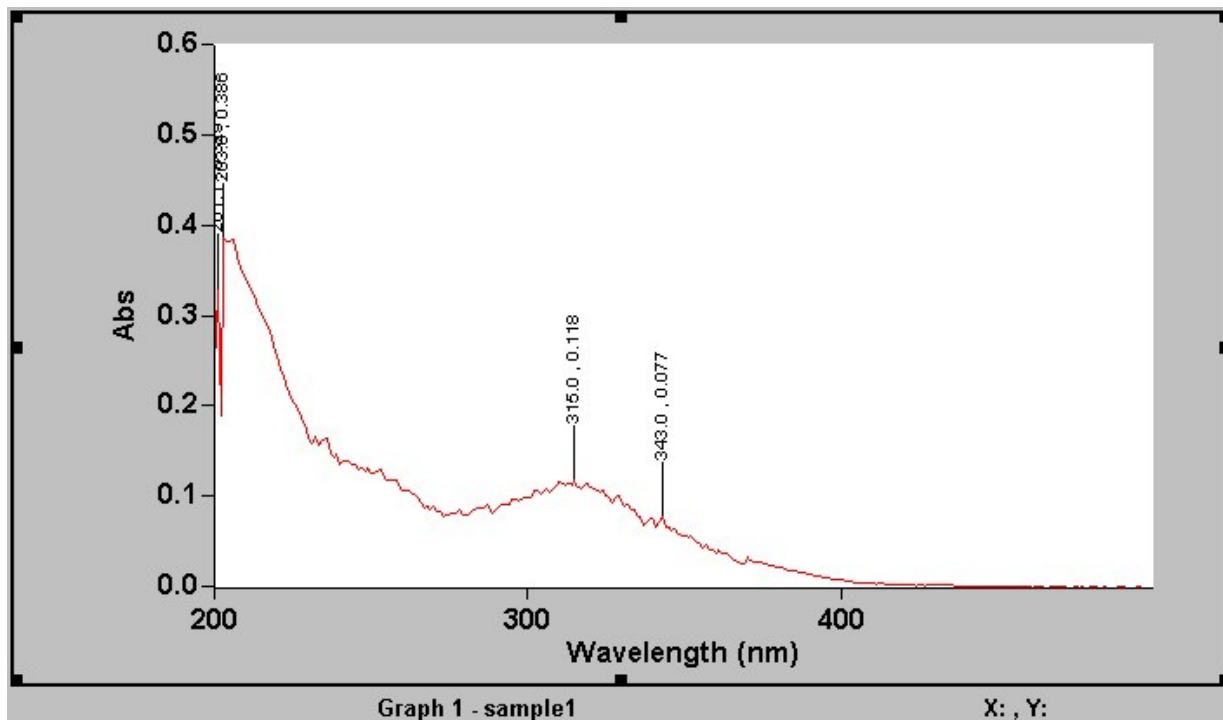

### IR spectrum of compound 3

E:\□ □ □ □ \□ □ □ □ \20130905\ZH2-13-15.0

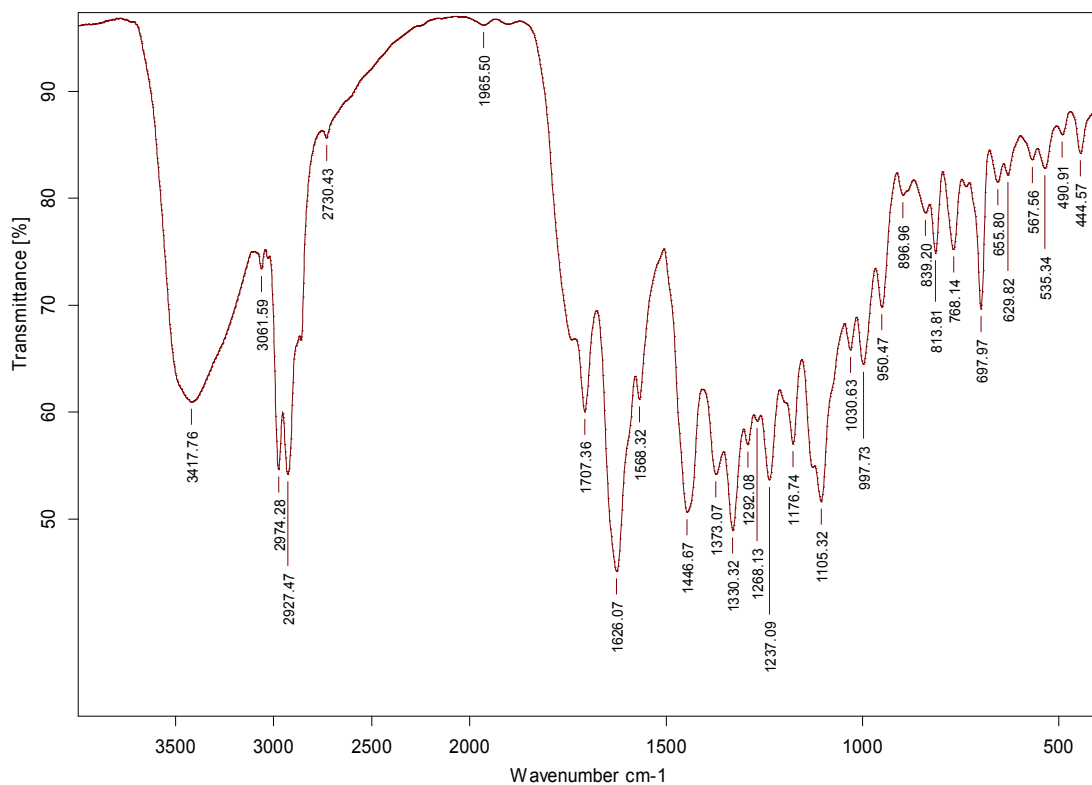

### <sup>1</sup>H NMR of compound 3

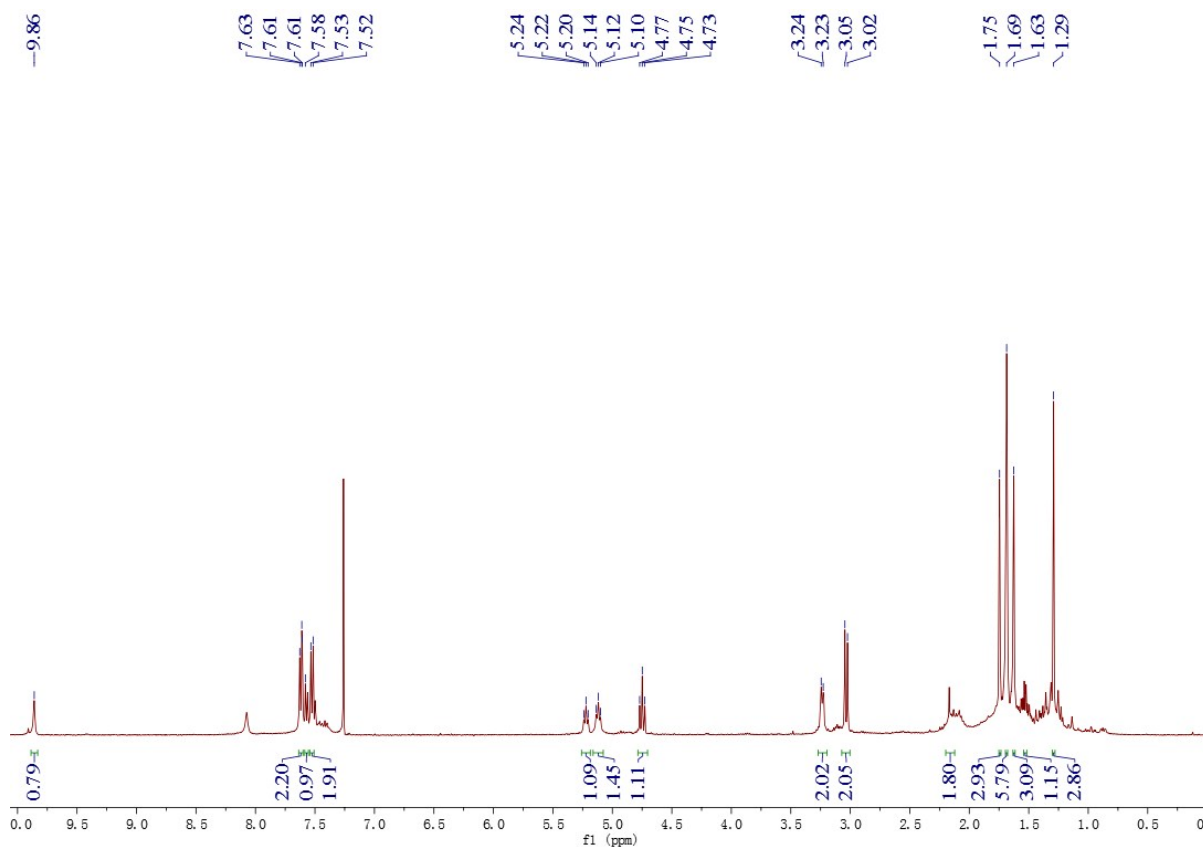

### <sup>13</sup>C NMR and DEPT of compound 3

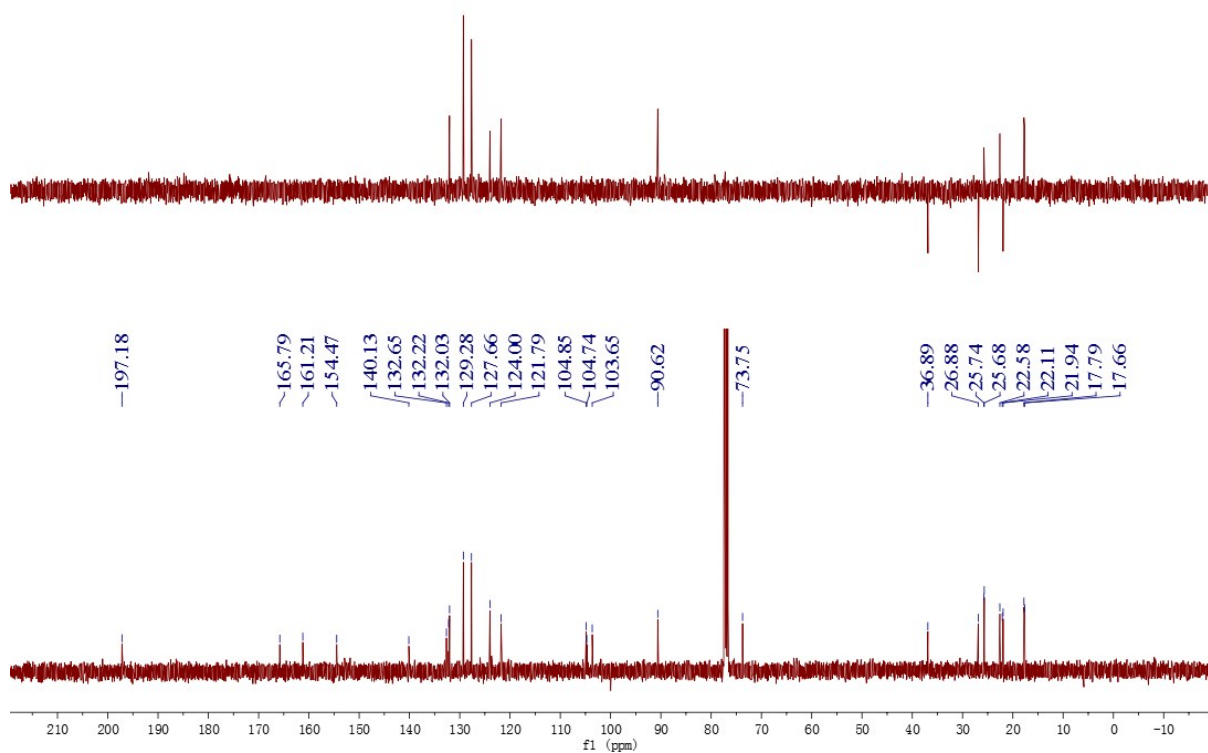

### HSQC of compound 3

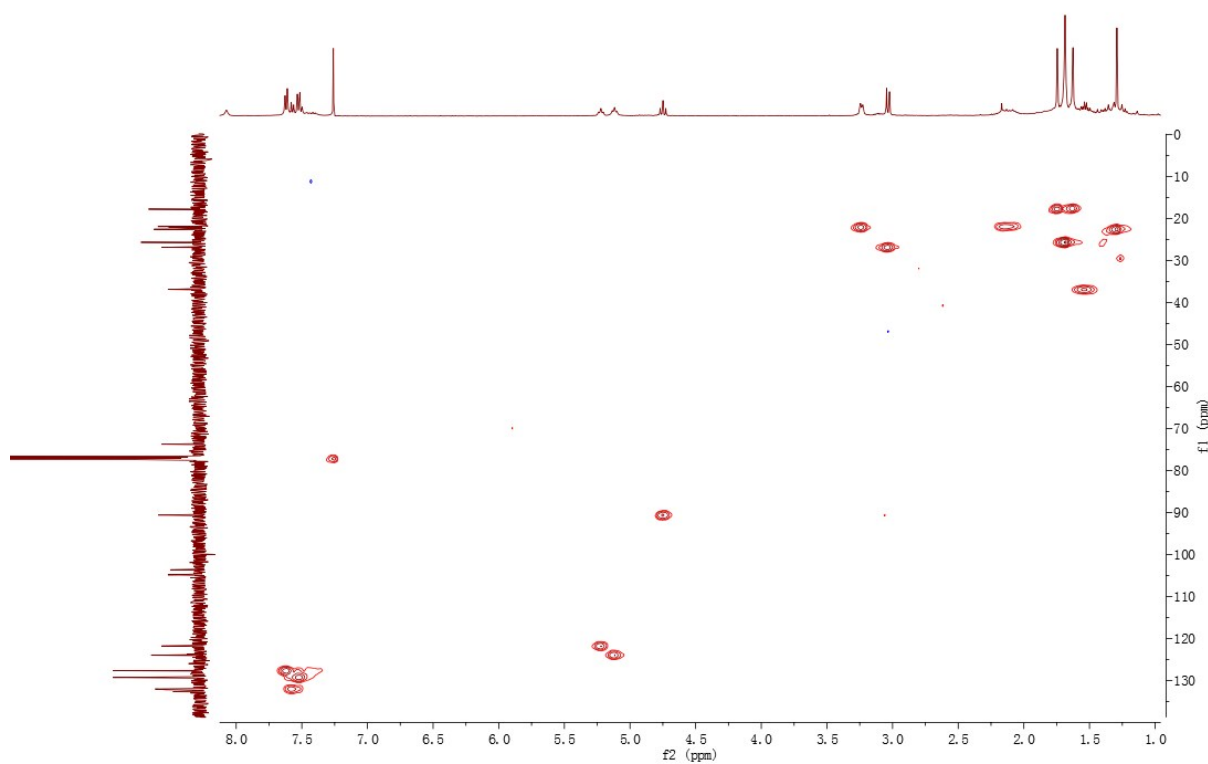

### HMBC of compound 3

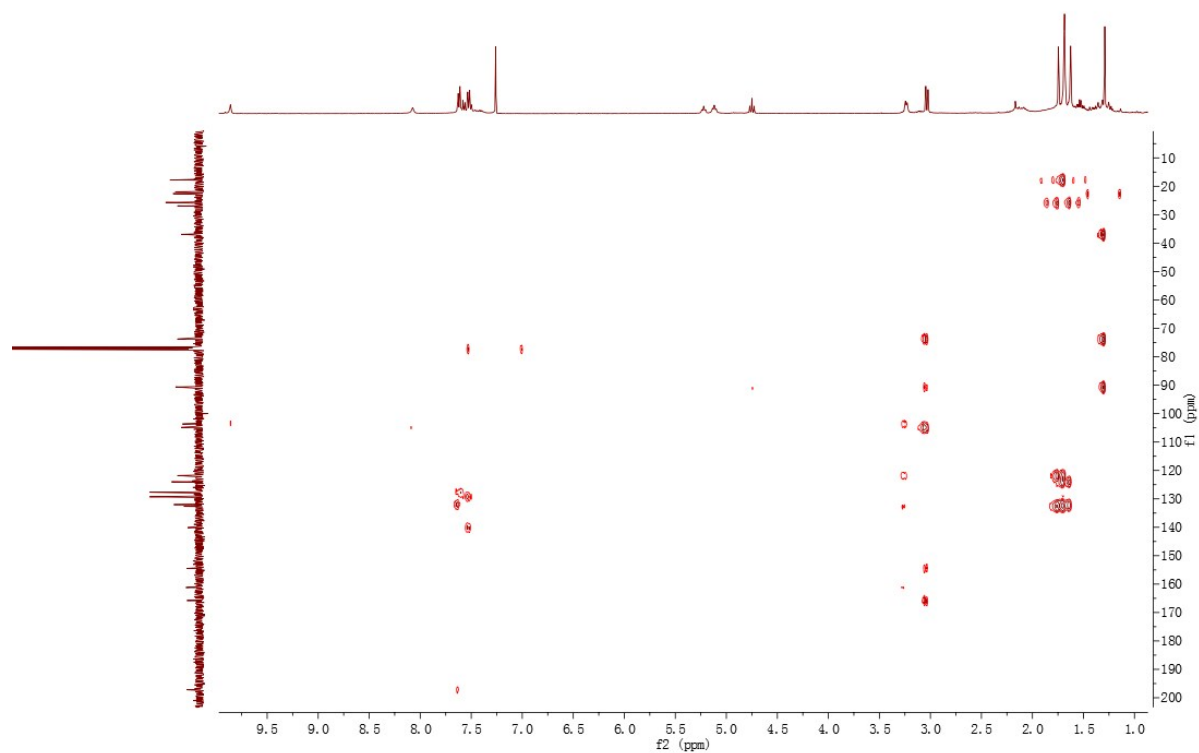

### $^1\text{H}$ - $^1\text{H}$ COSY of compound 3

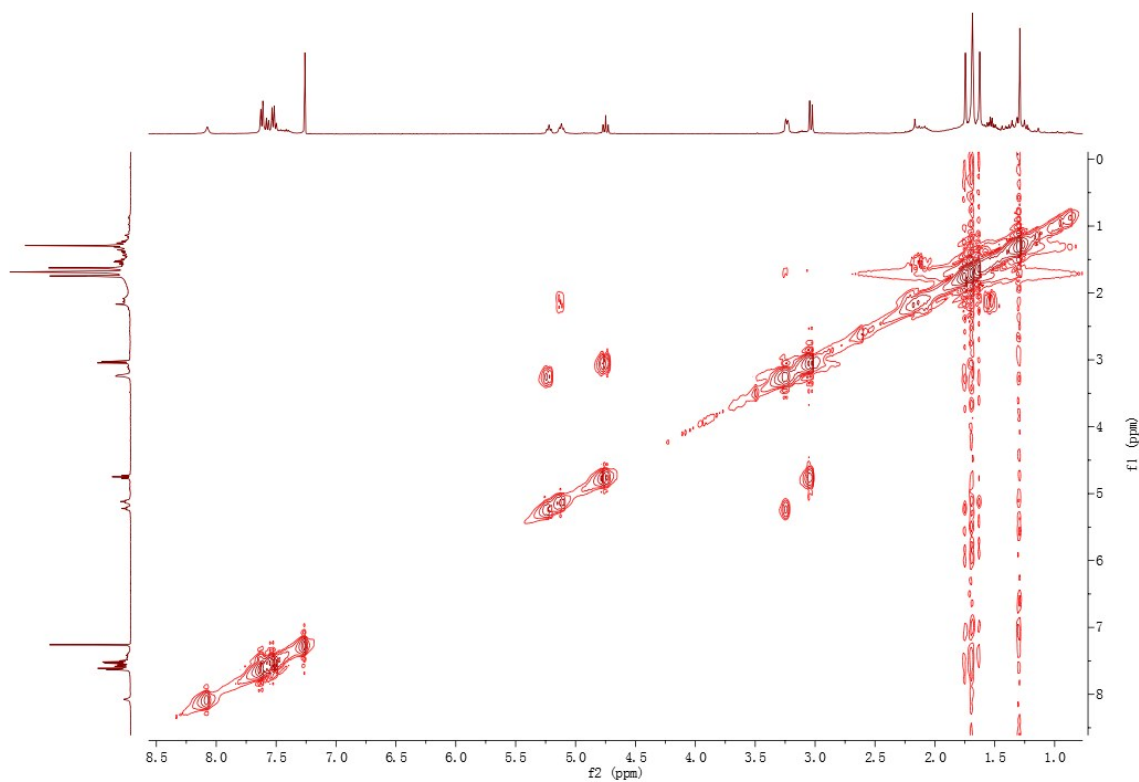



### NOESY of compound 3

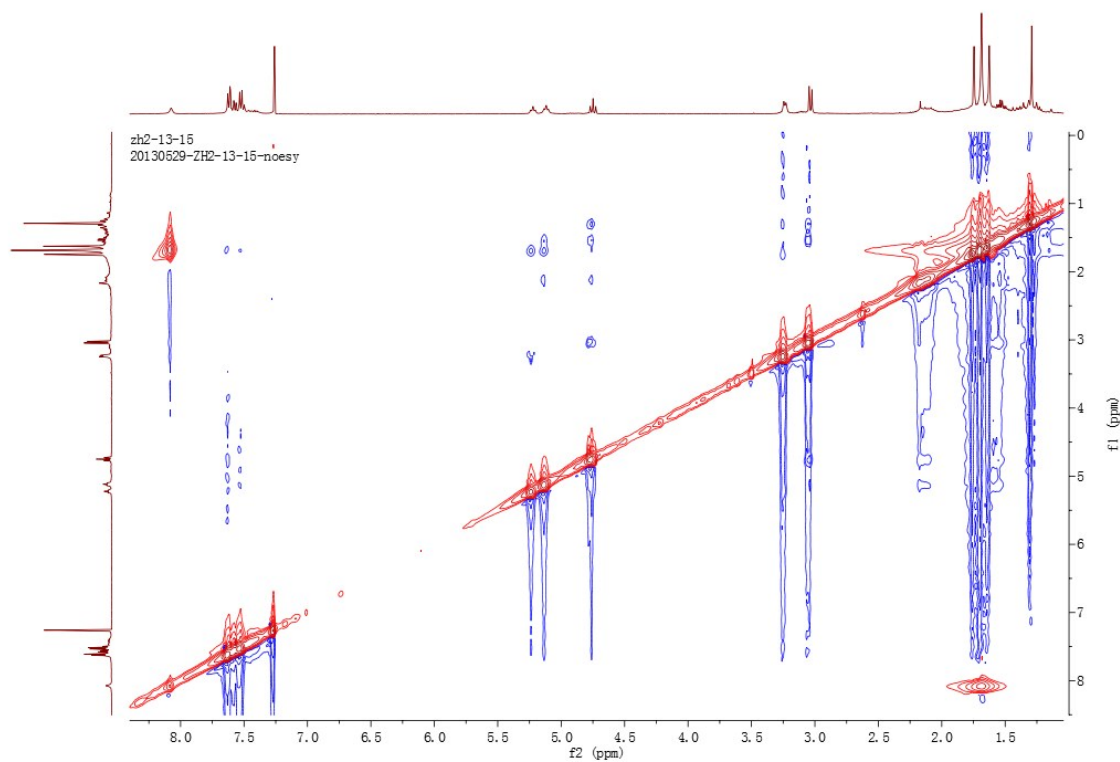

### HRESIMS of compound 4

ZH2-11-2 #27 RT: 0.38 AV: 1 NL: 3.87E6  
T: FTMS + p ESI Full ms [50.00-1050.00]

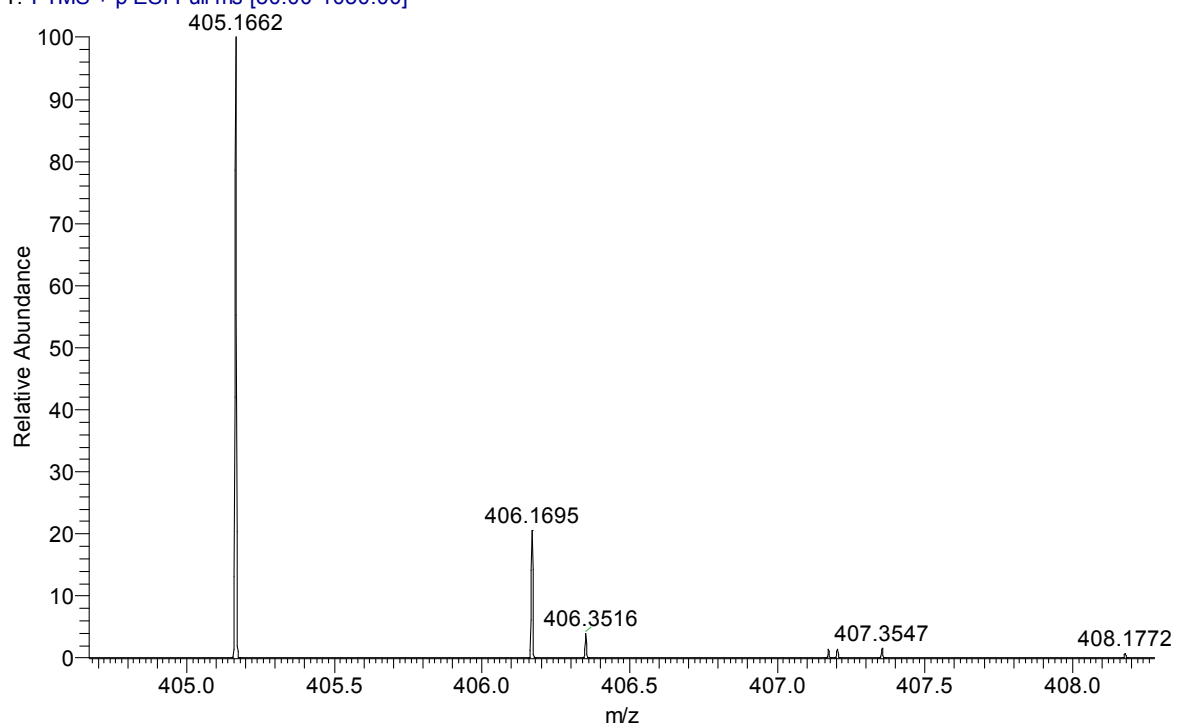

### UV spectrum of compound 4

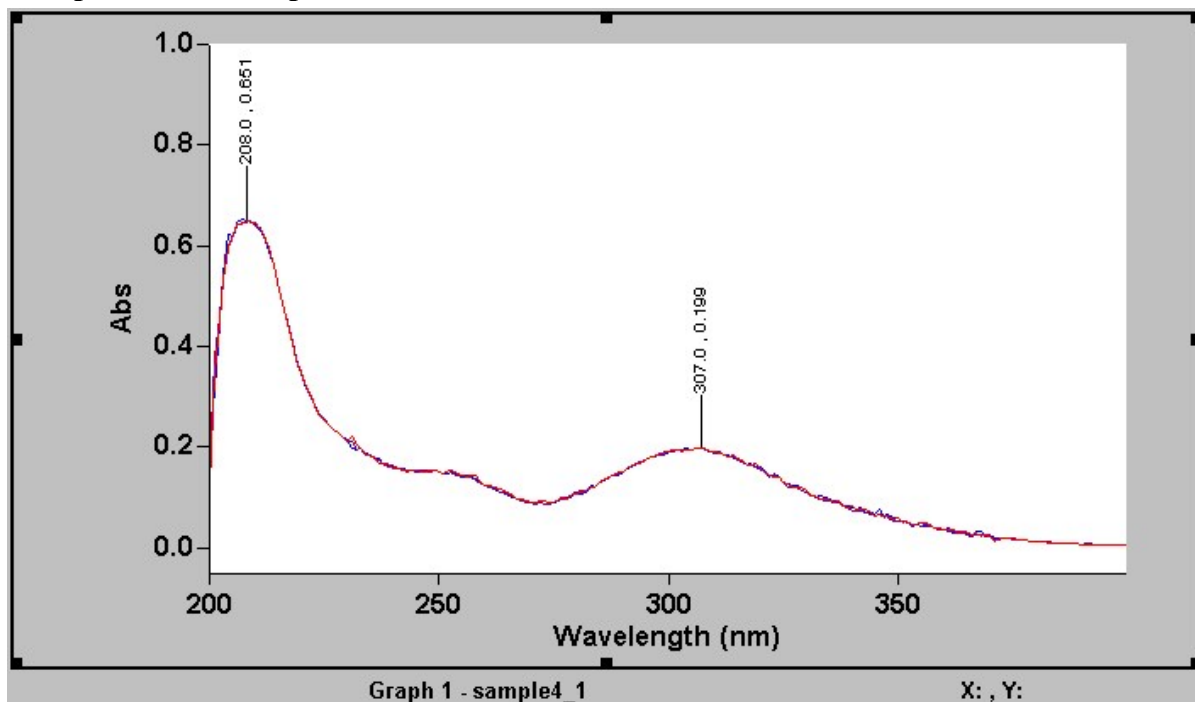

### IR spectrum of compound 4

E:\□ □ □ □ \□ □ □ \20130314\zh2-11-2.0

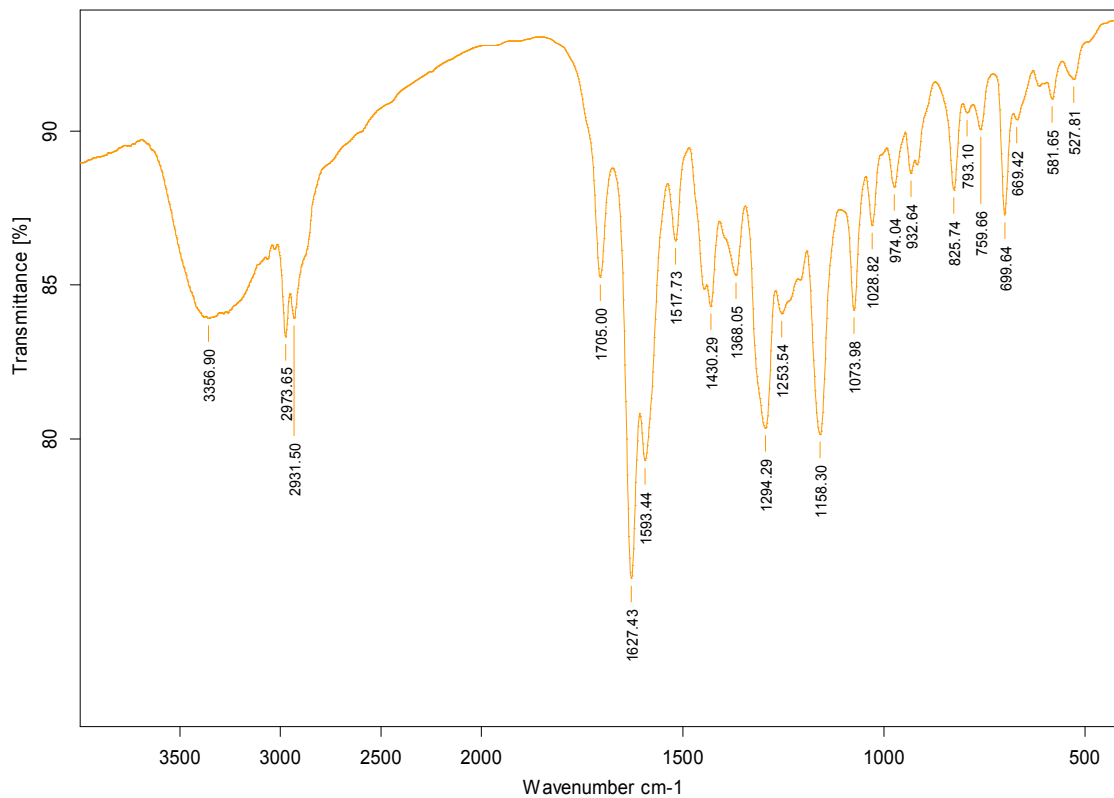

### <sup>1</sup>H NMR of compound 4

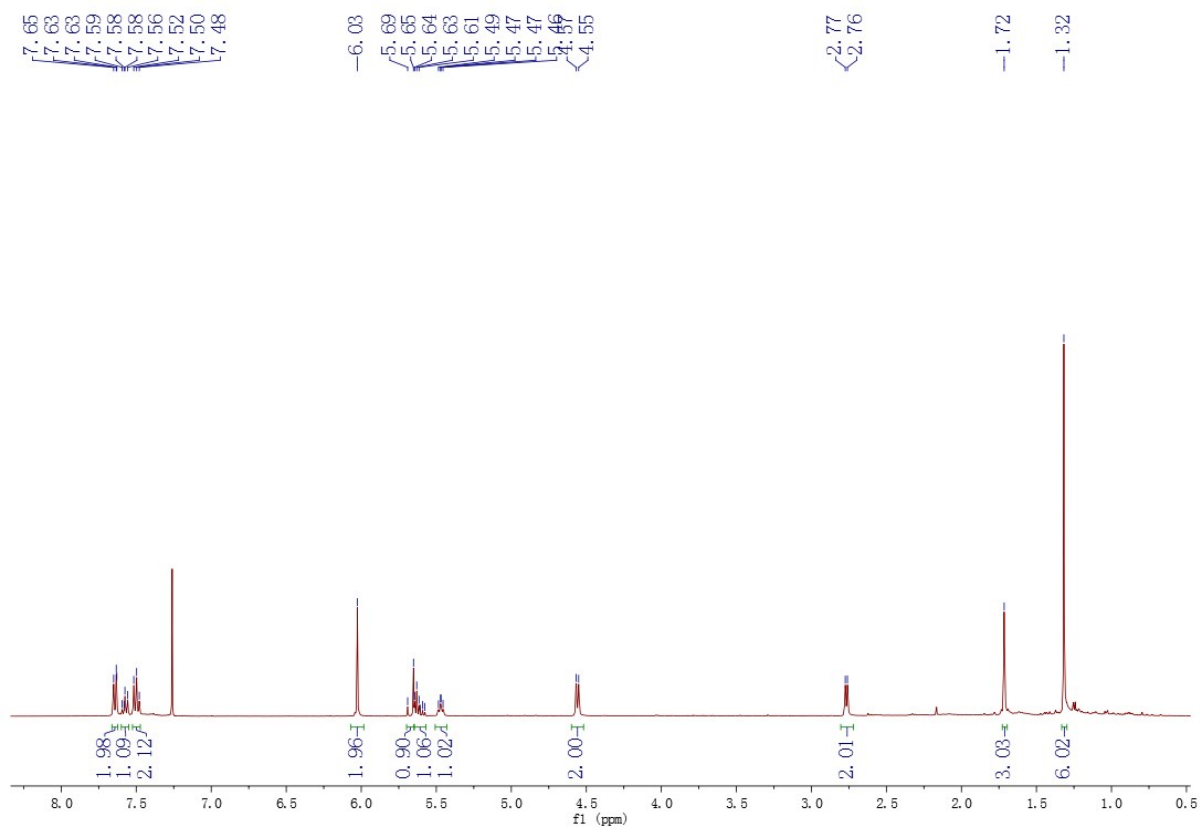

### <sup>13</sup>C NMR and DEPT of compound 4

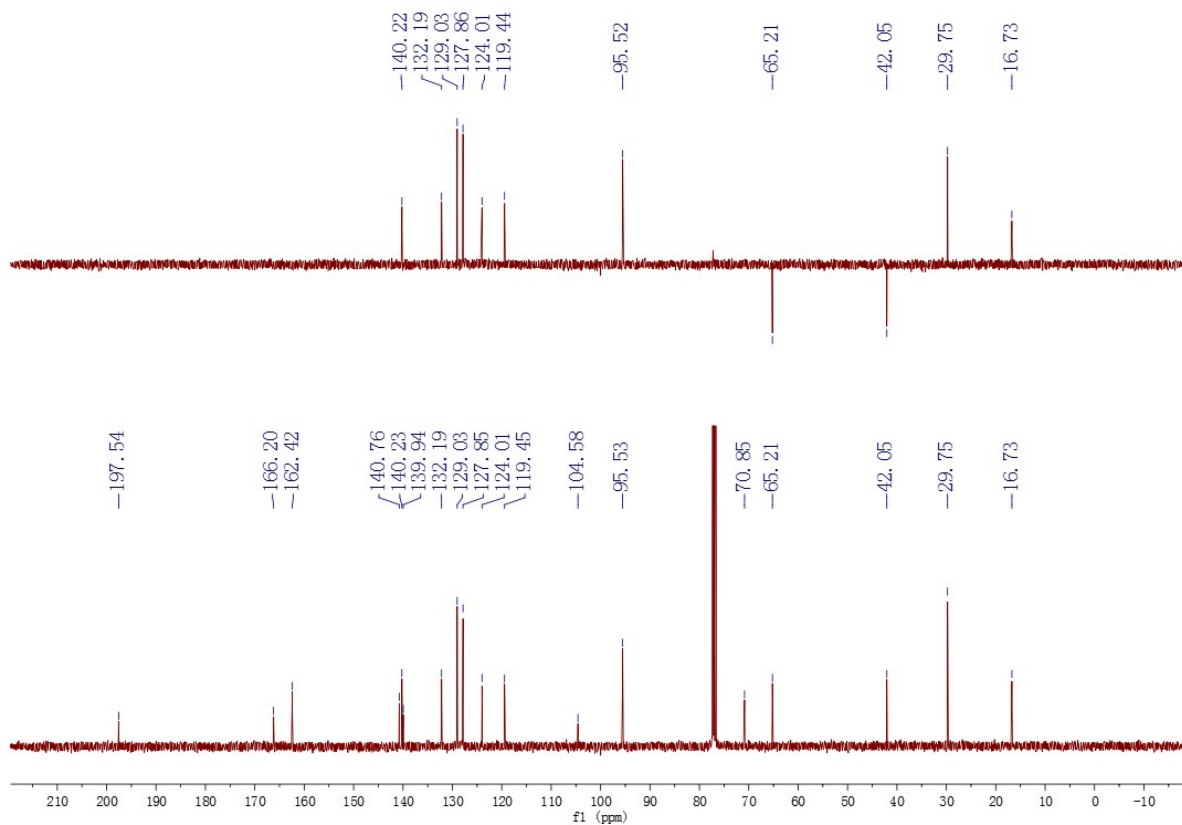

### HSQC of compound 4

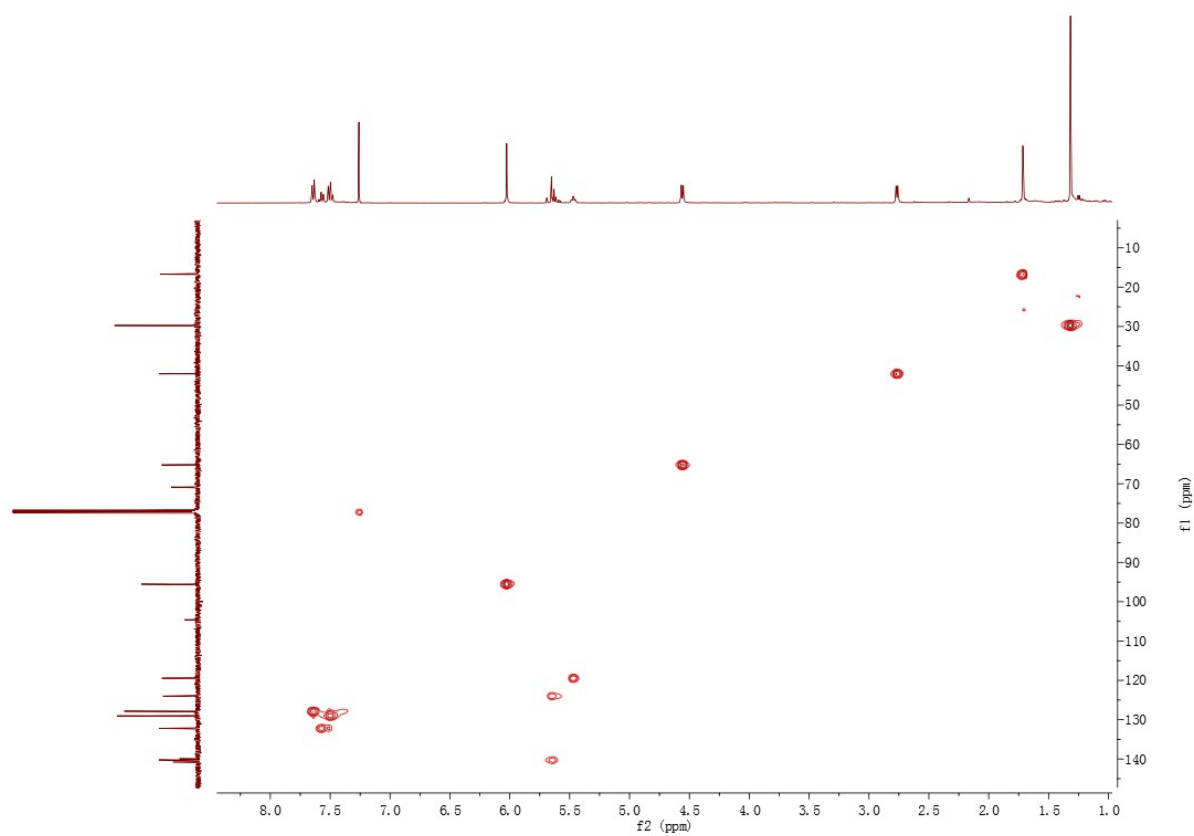

### HMBC of compound 4

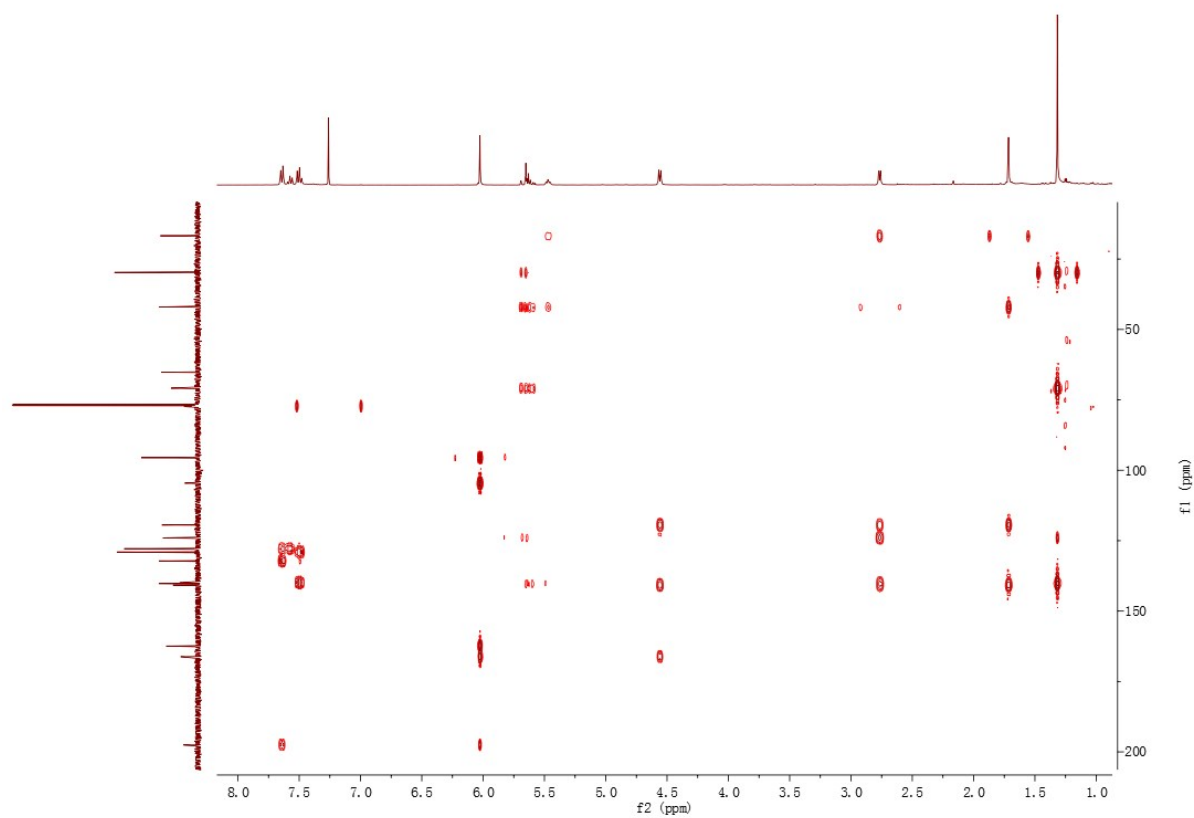

### $^1\text{H}$ - $^1\text{H}$ COSY of compound 4

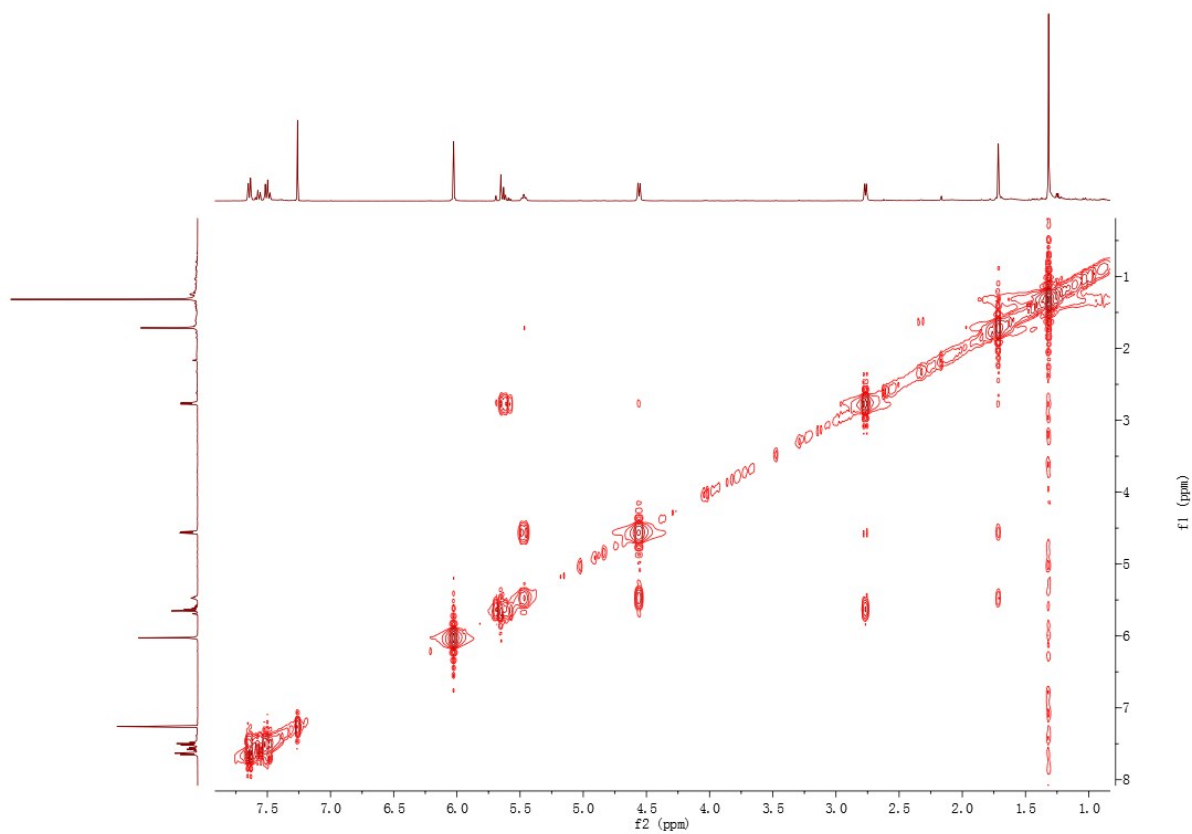

### NOESY of compound 4

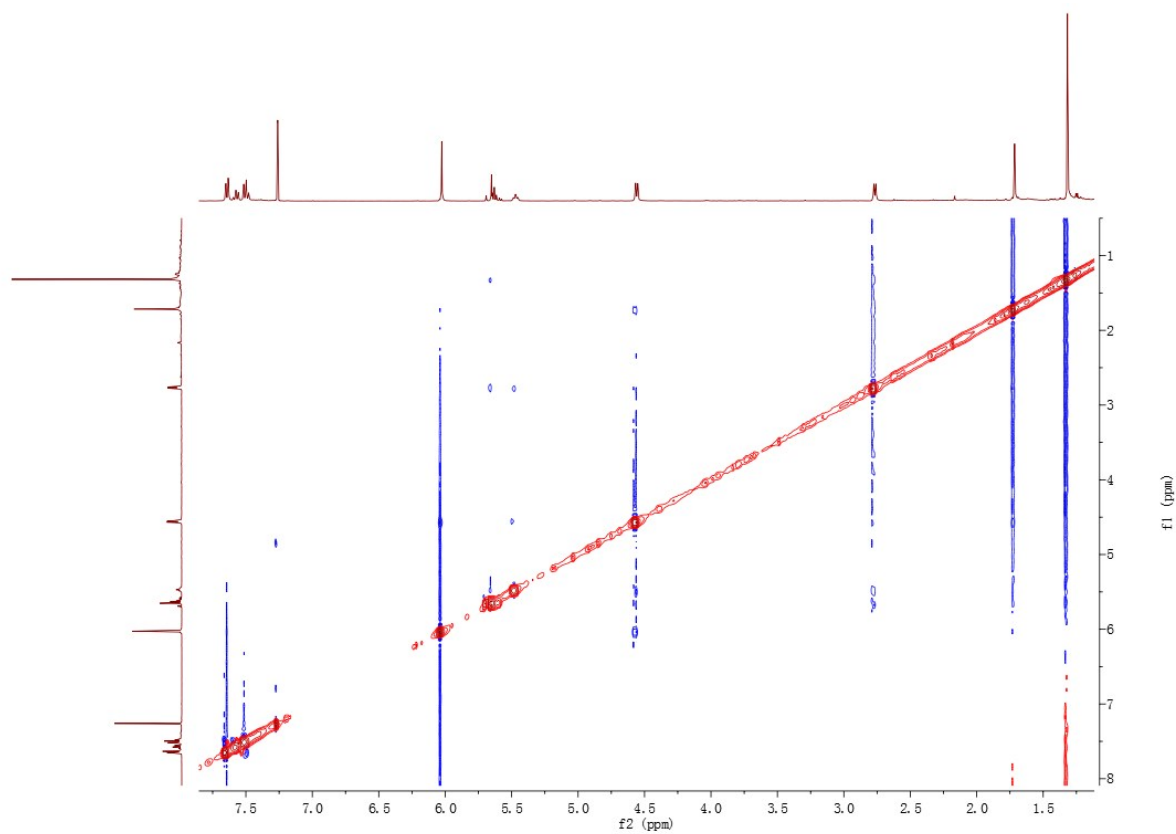

## HRESIMS of compound 5

ZH2-11-6 #24 RT: 0.34 AV: 1 NL: 1.34E6  
T: FTMS + p ESI Full ms [50.00-1050.00]

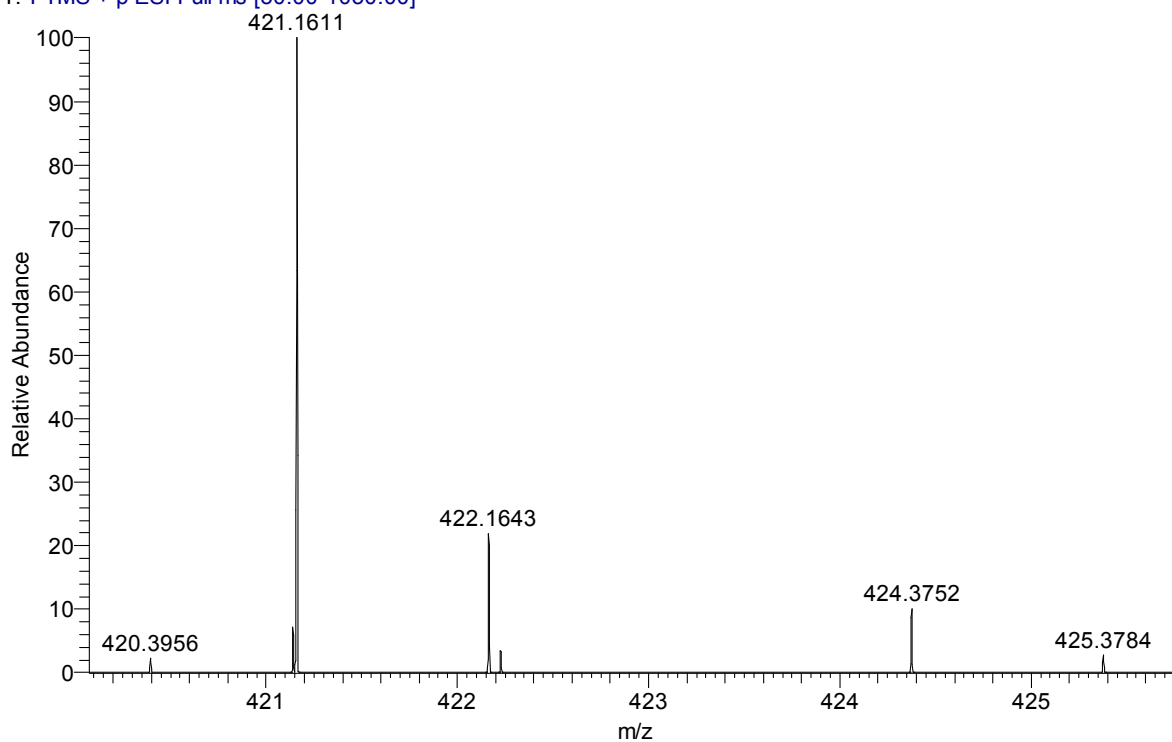

## UV spectrum of compound 5

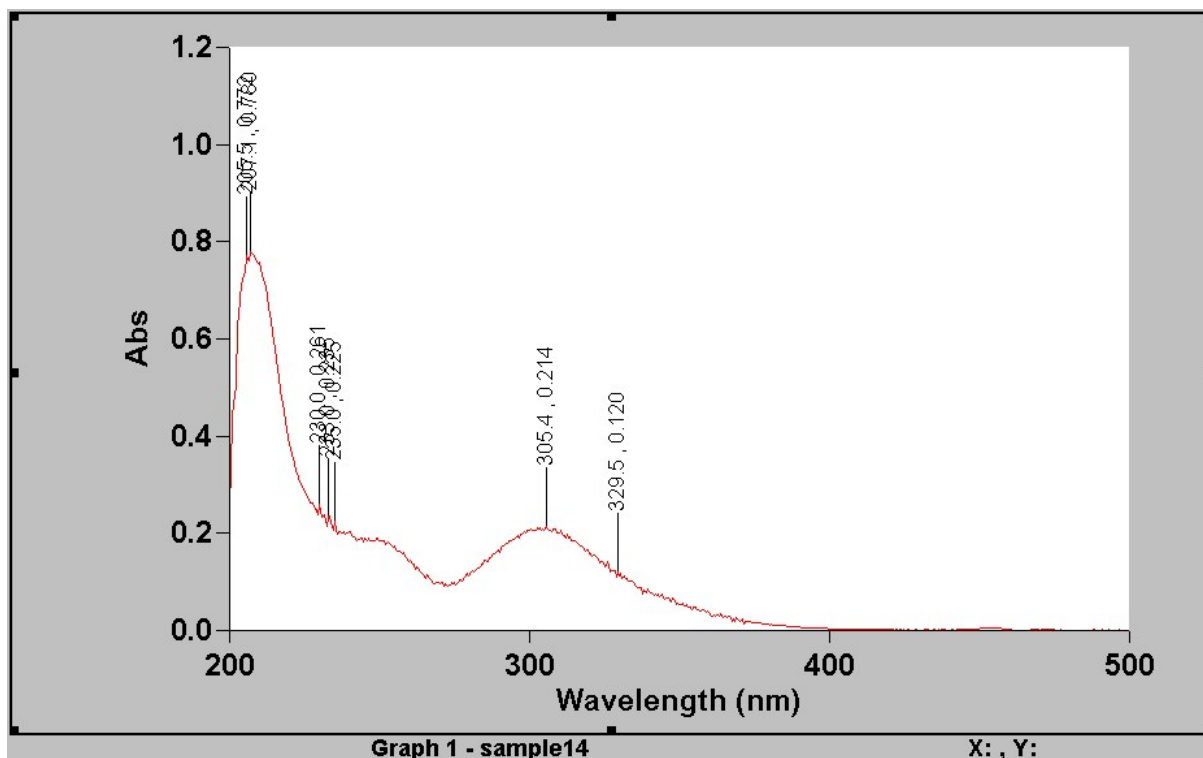

## IR spectrum of compound 5

E:\□ □ □ □ \□ □ □ \20130905\ZH2-11-6.0

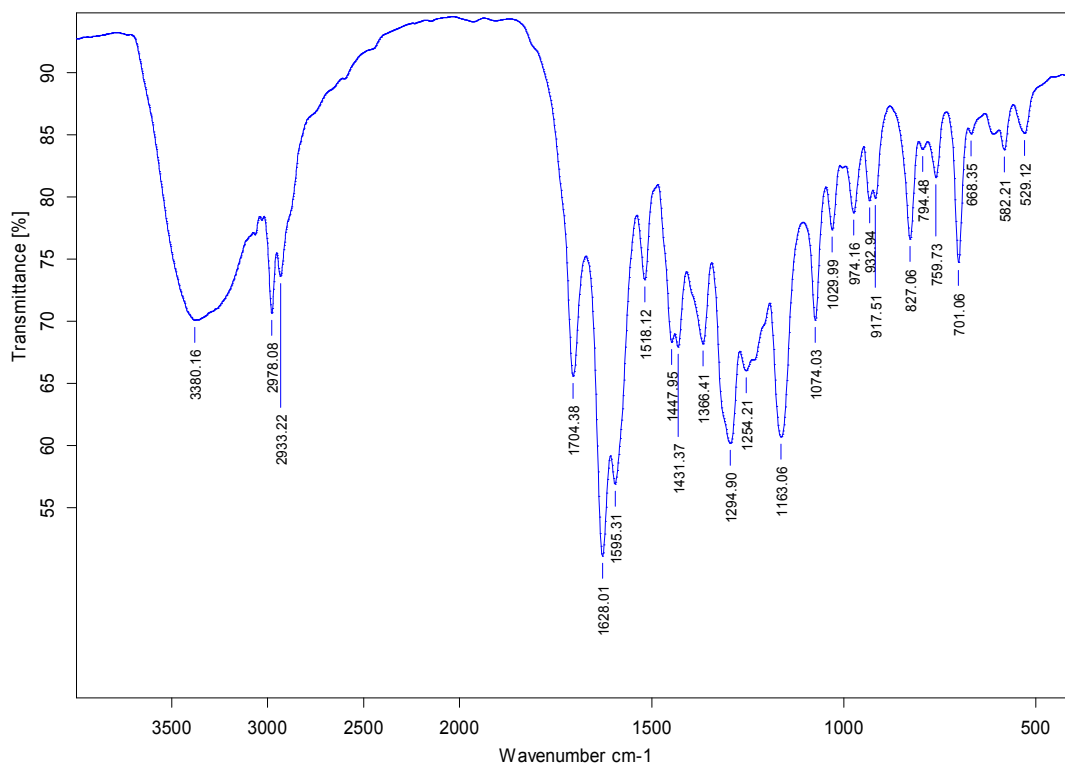

## <sup>1</sup>H NMR of compound 5

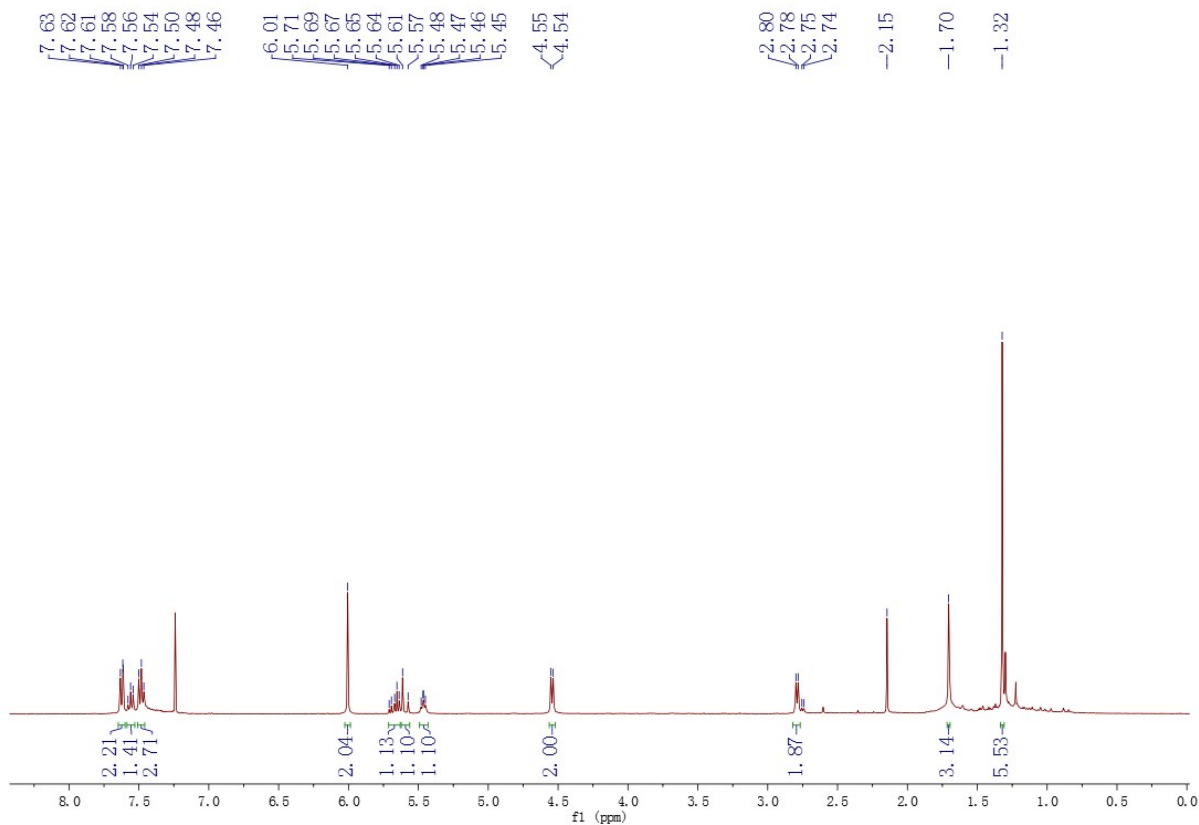

## <sup>13</sup>C NMR and DEPT of compound 5

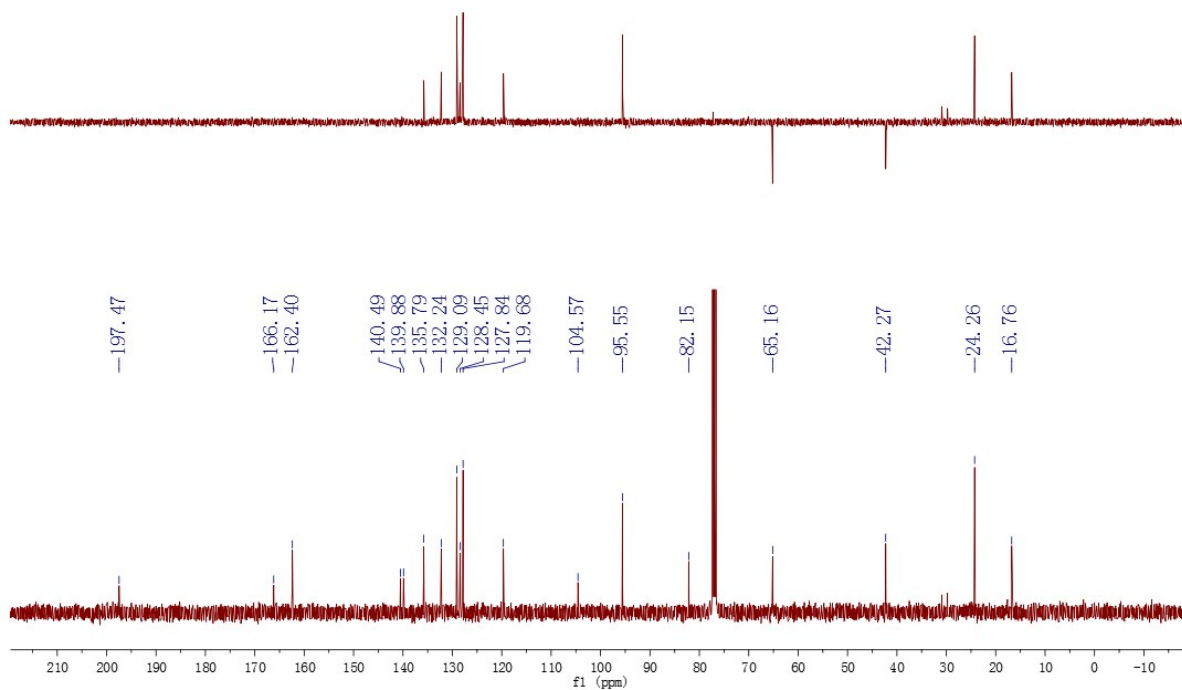

## HSQC of compound 5

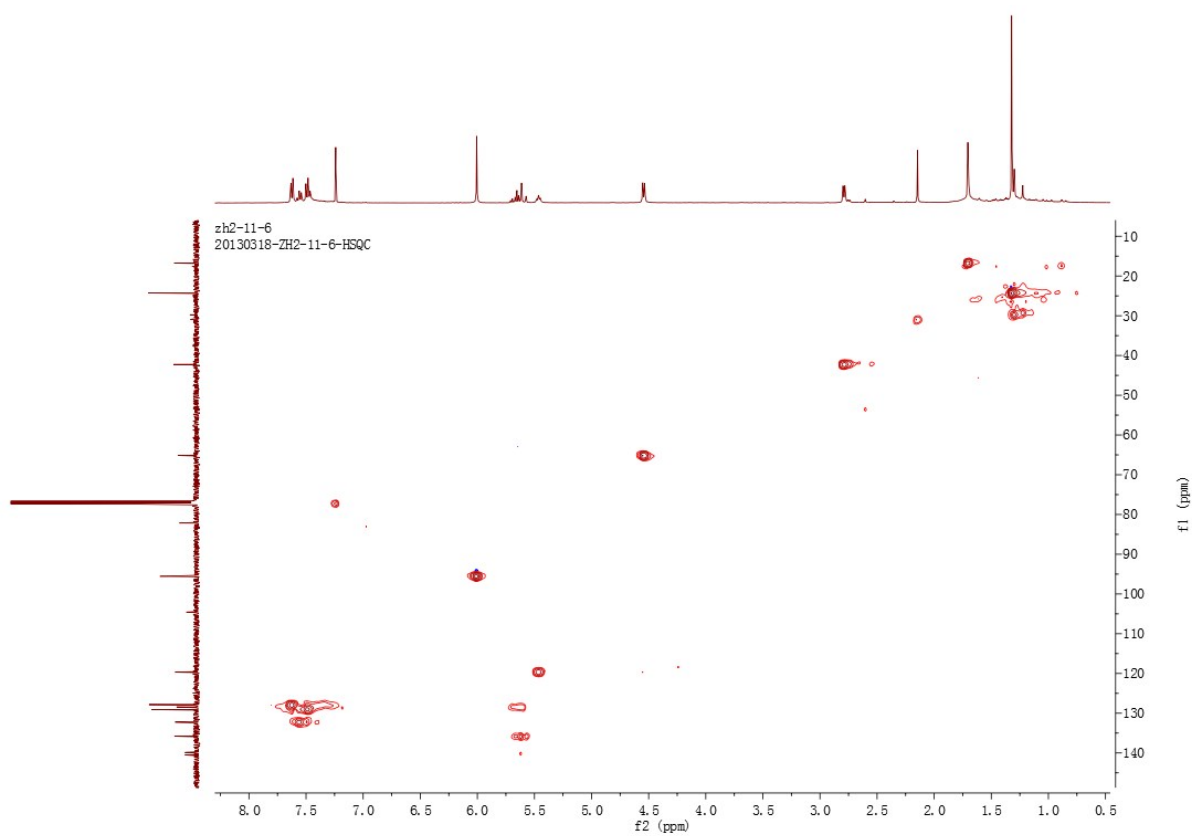



## HMBC of compound 5

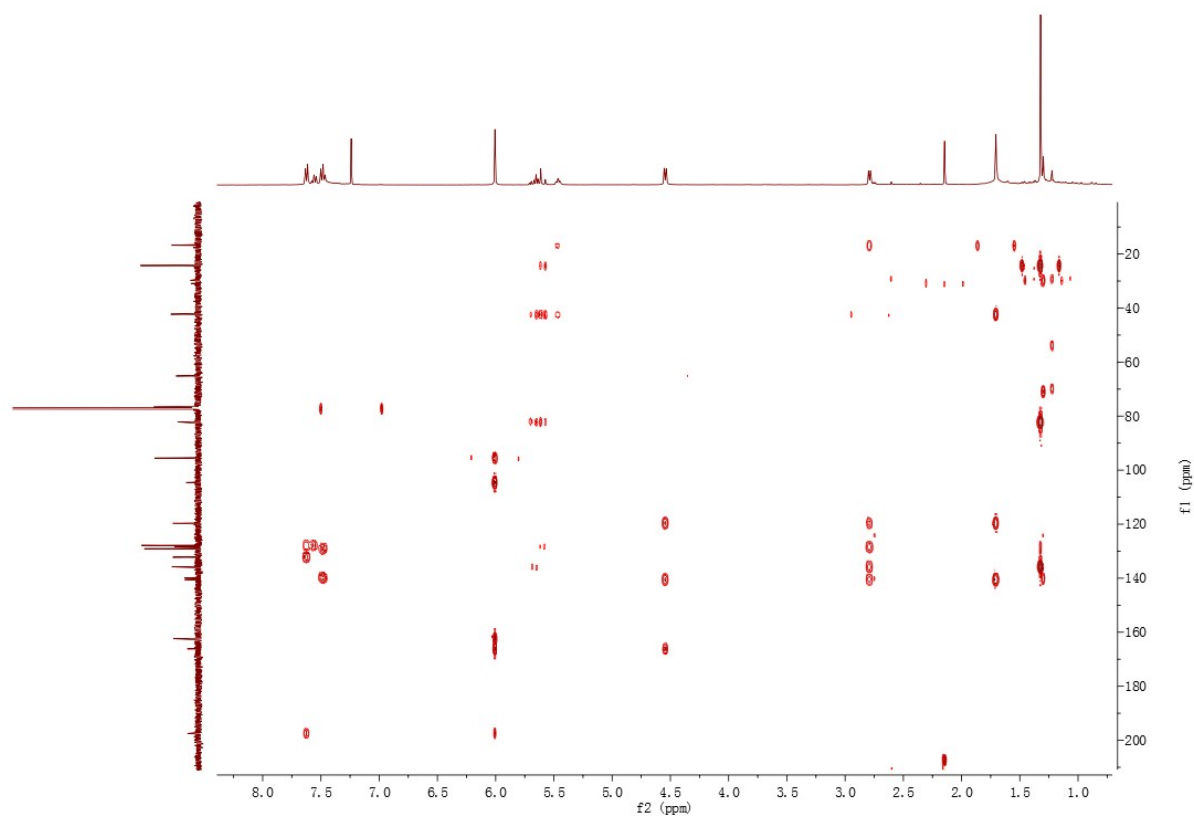

## HRESIMS of compound 6

ZH2-11-4 #28 RT: 0.39 AV: 1 NL: 1.27E6  
T: FTMS + p ESI Full ms [50.00-1050.00]

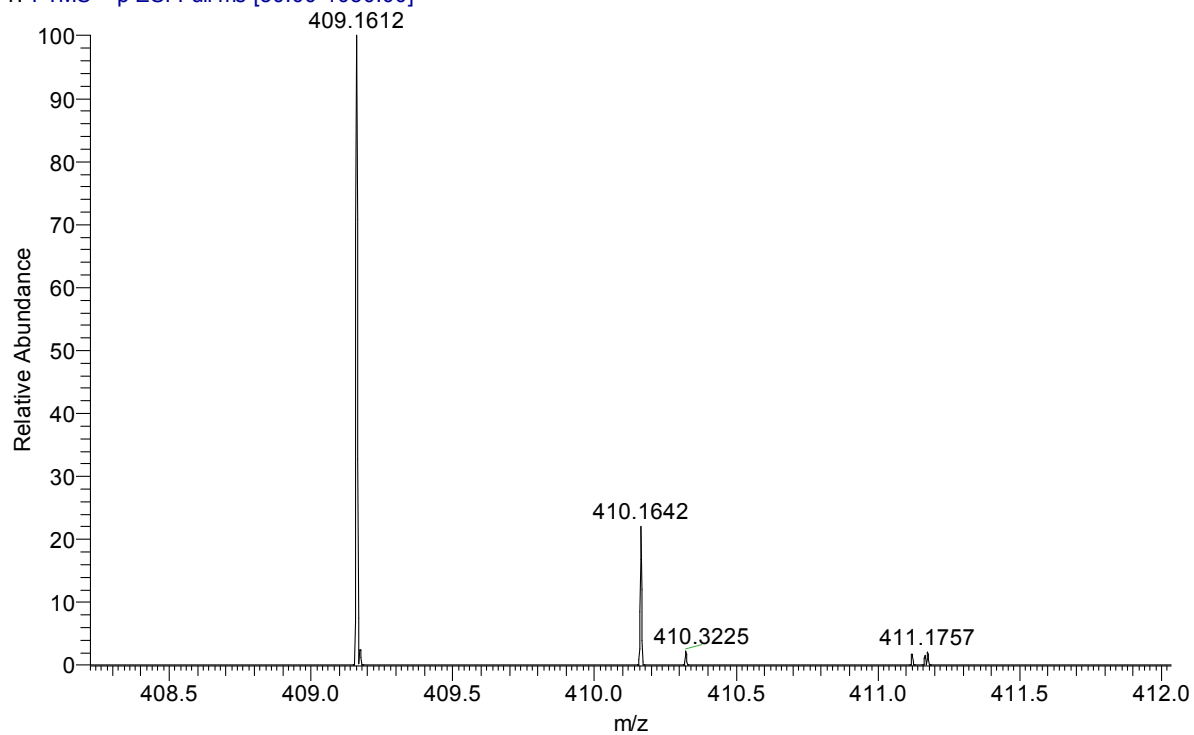

### UV spectrum of compound 6

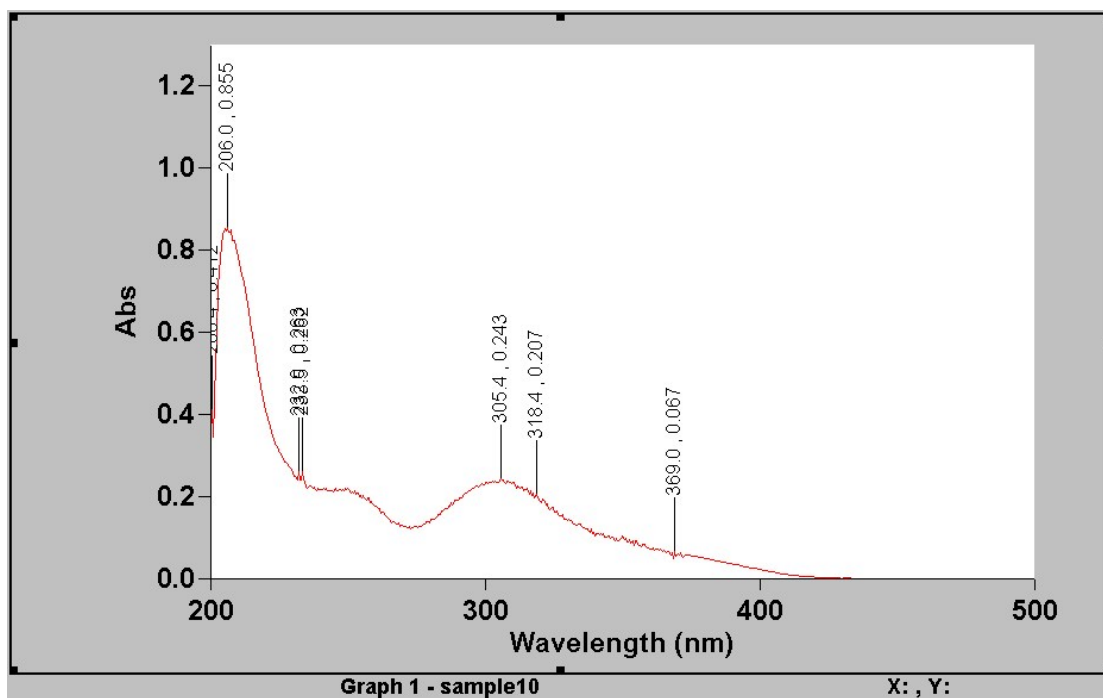

### <sup>1</sup>H NMR of compound 6

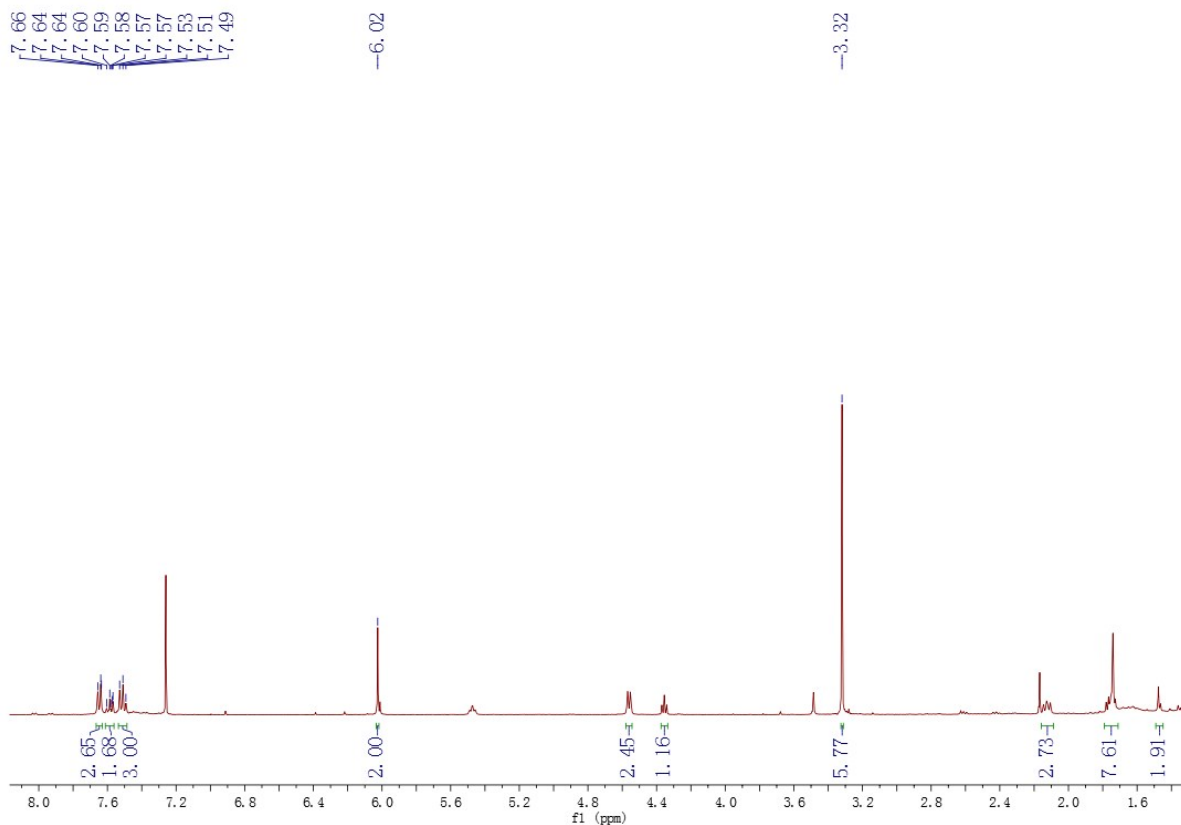

## <sup>13</sup>C NMR and DEPT of compound 6

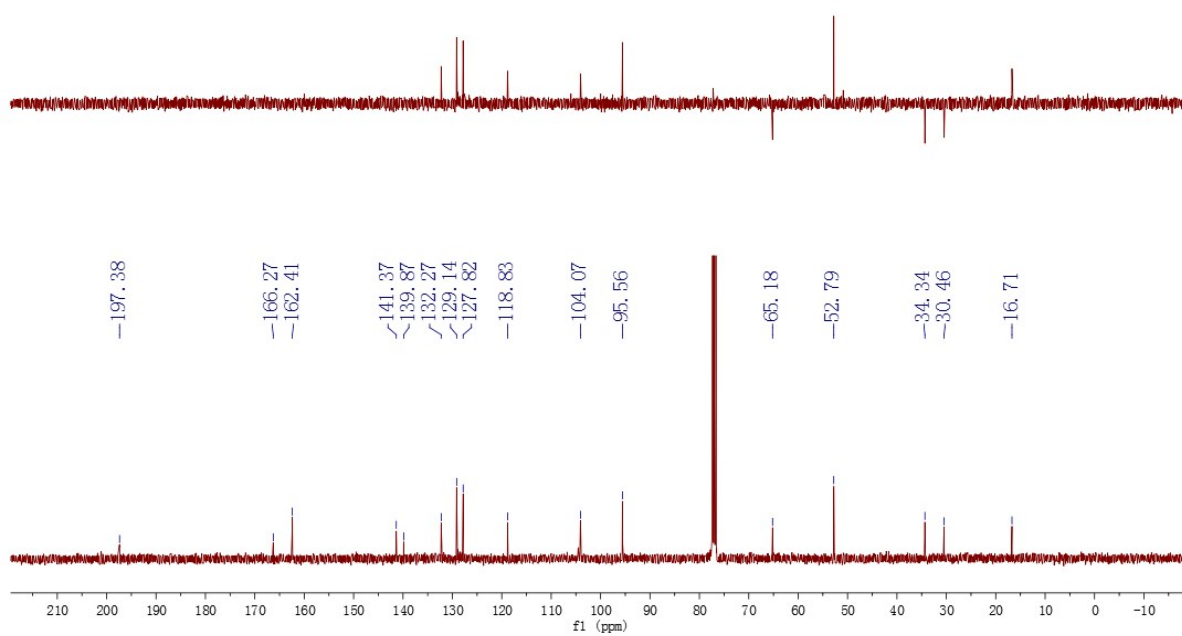

## HSQC of compound 6

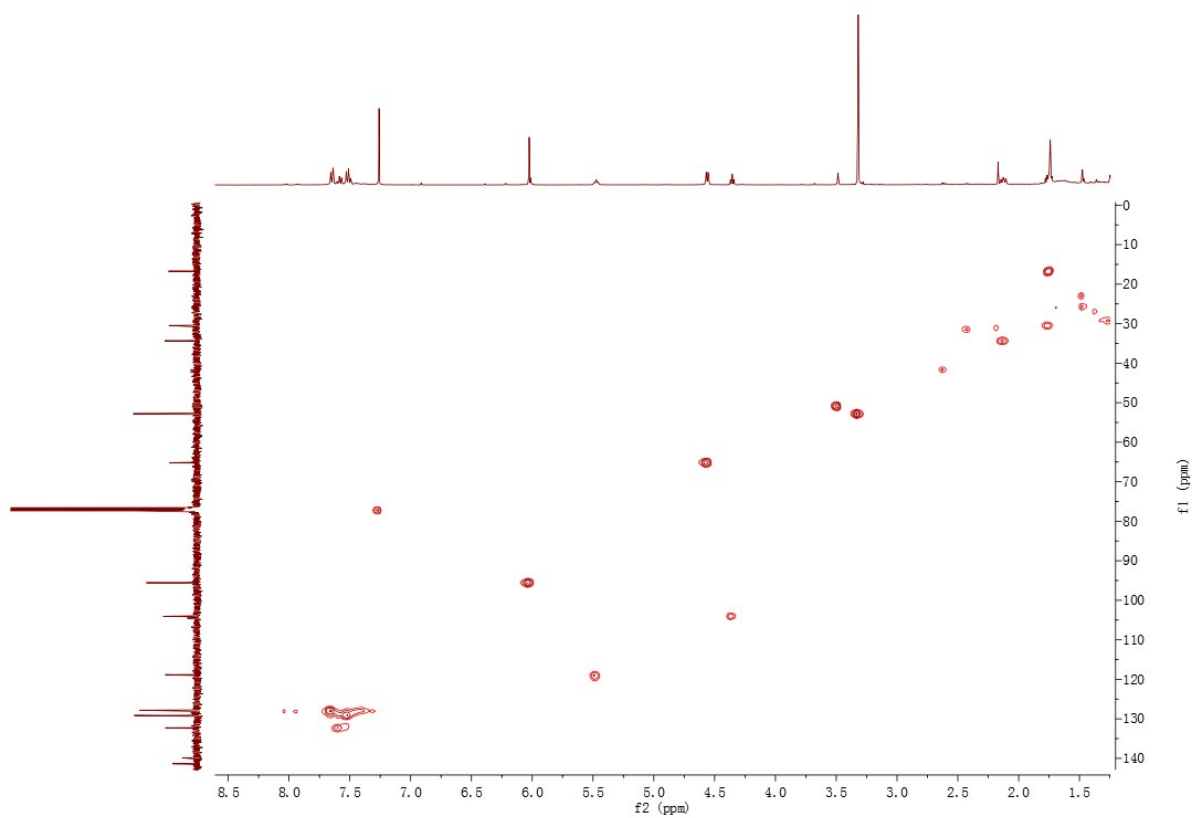

## HMBC of compound 6

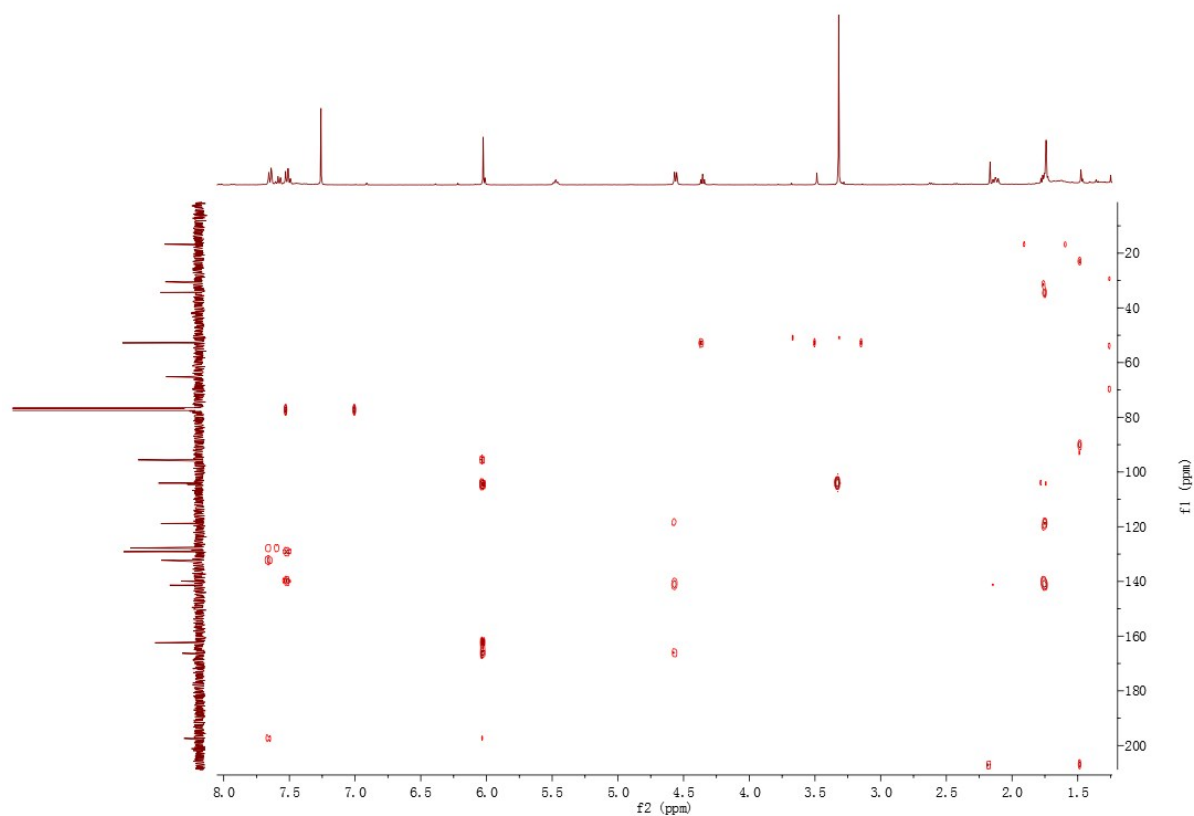

## HRESIMS of compound 7

ZH2-11-3 #26 RT: 0.36 AV: 1 NL: 2.10E7  
T: FTMS + p ESI Full ms [50.00-1050.00]

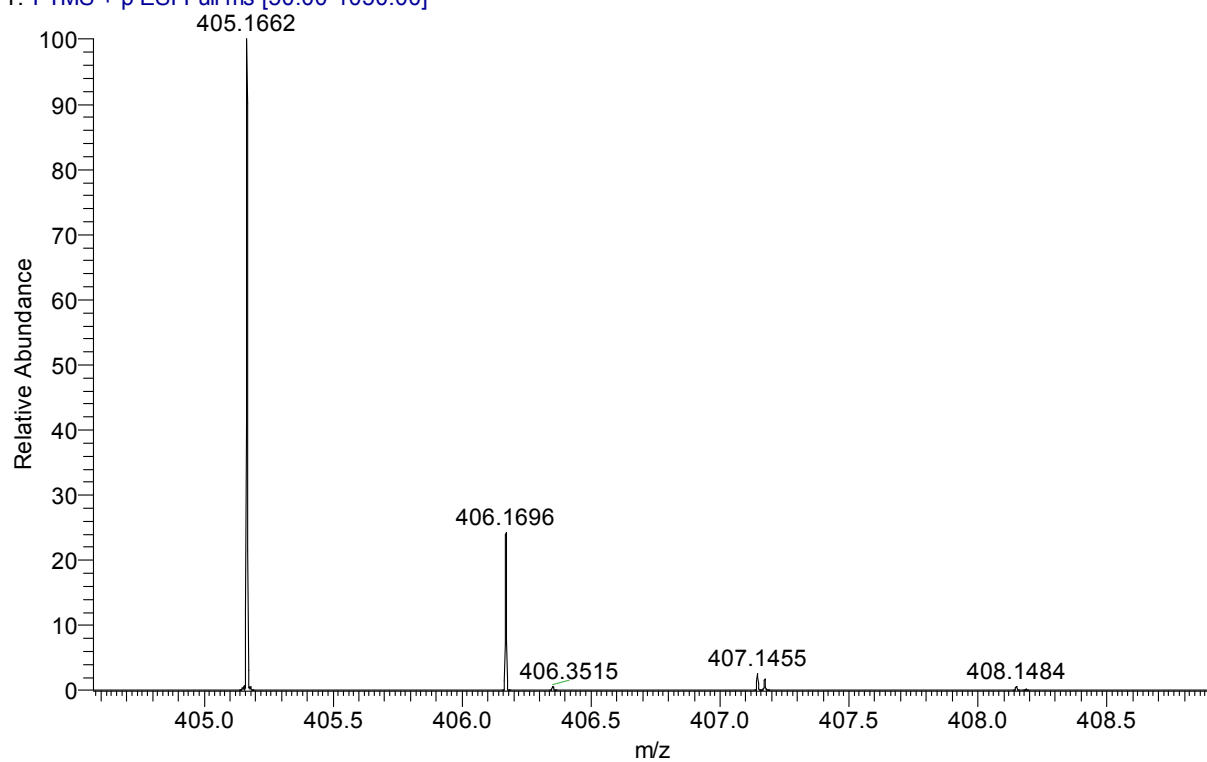

## UV spectrum of compound 7

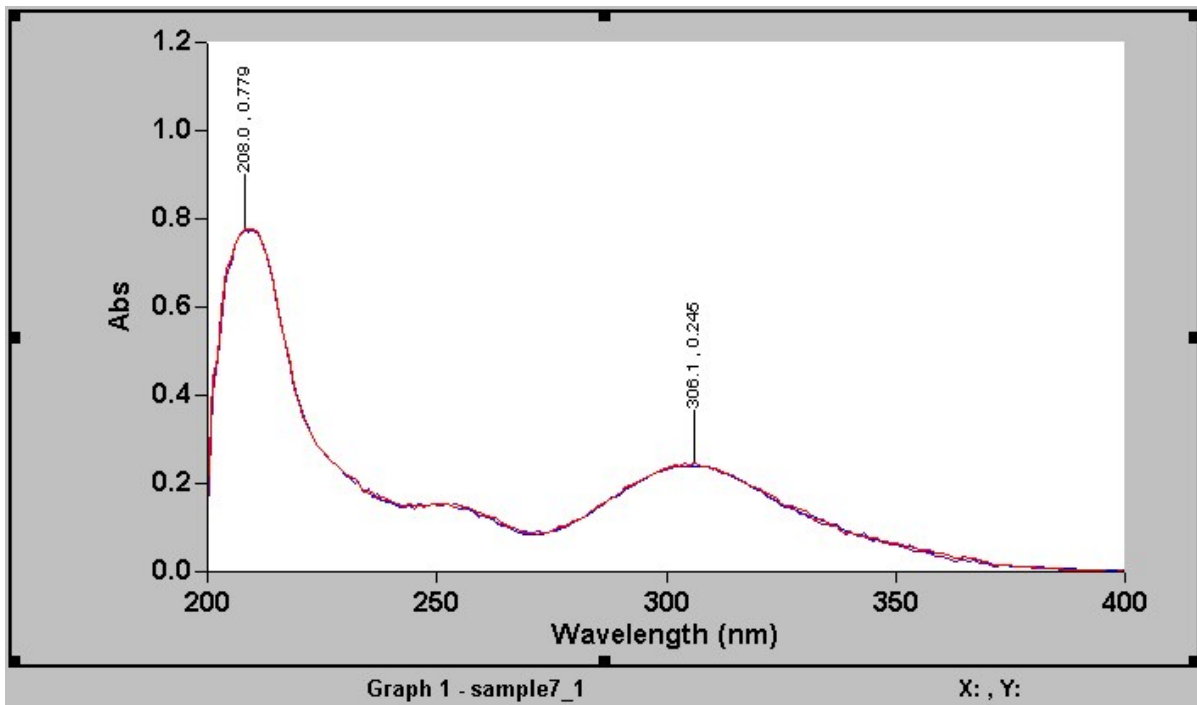

## IR spectrum of compound 7

E:\□□□□□□□□□□□□□□□□\20130314\zh2-11-3.0

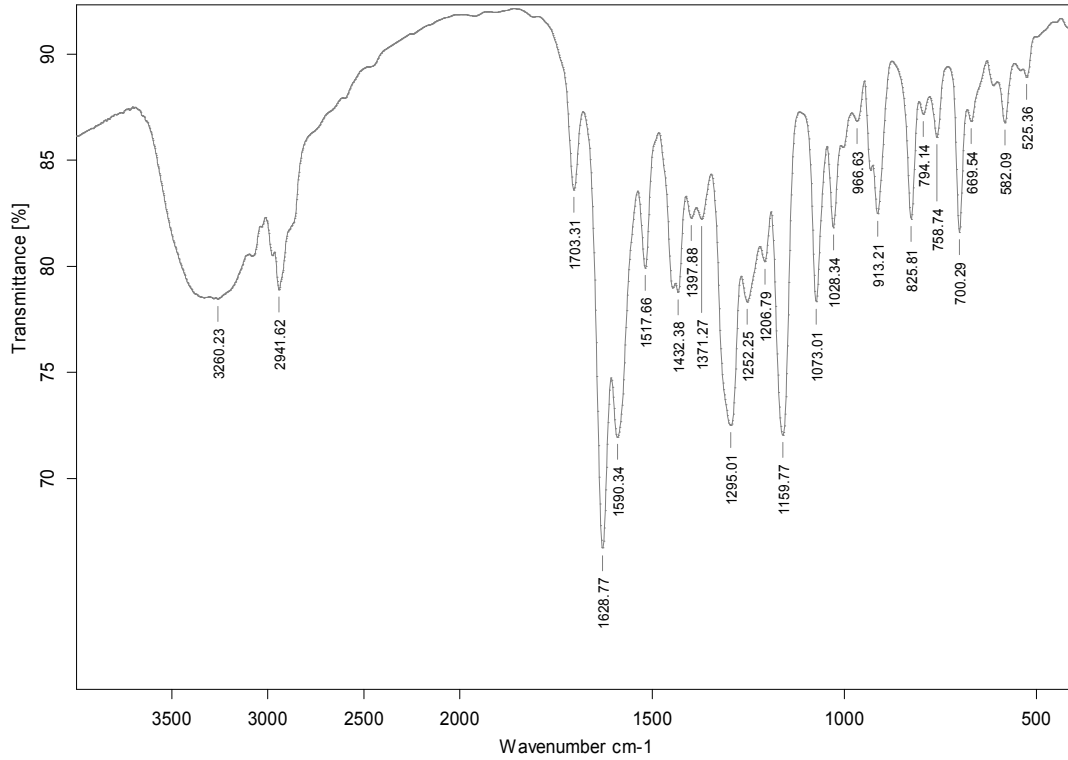

### <sup>1</sup>H NMR of compound 7

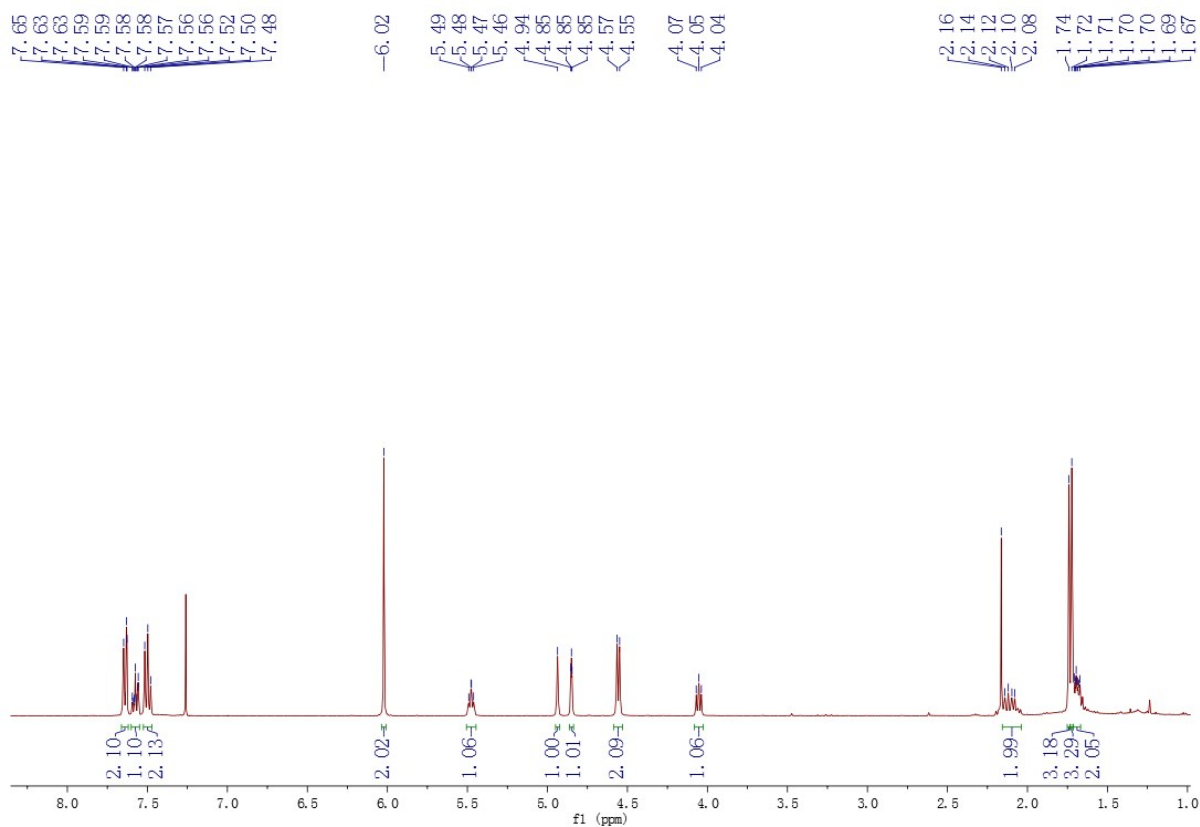

### <sup>13</sup>C NMR and DEPT of compound 7

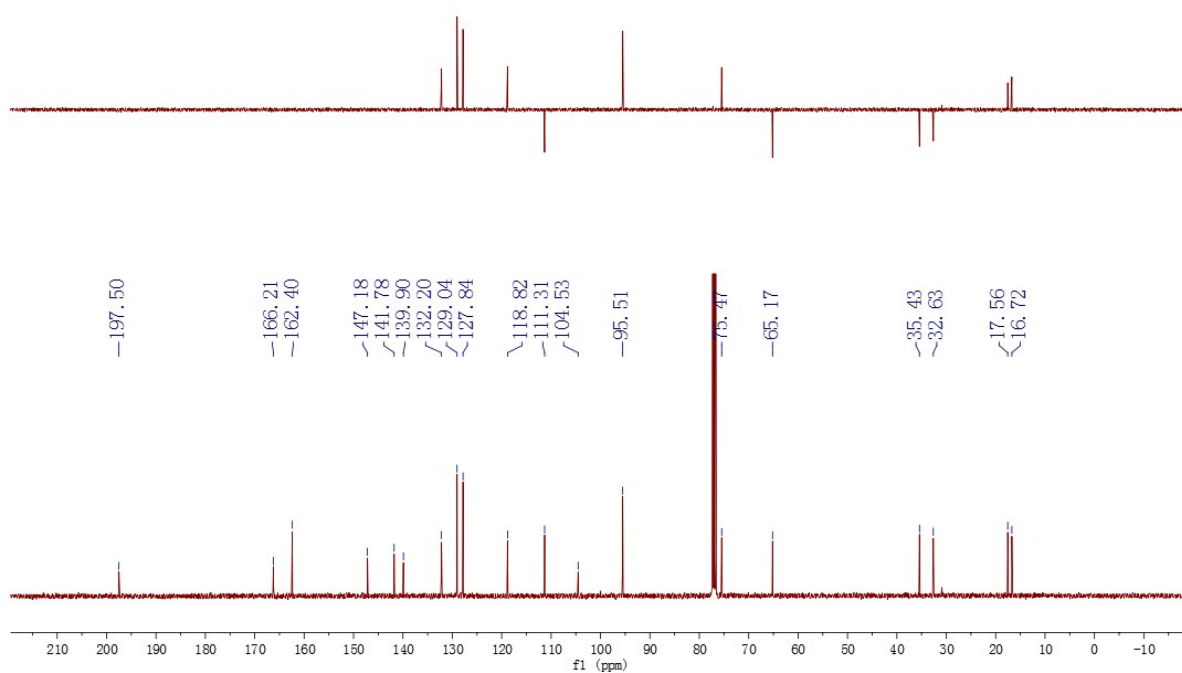

### HSQC of compound 7

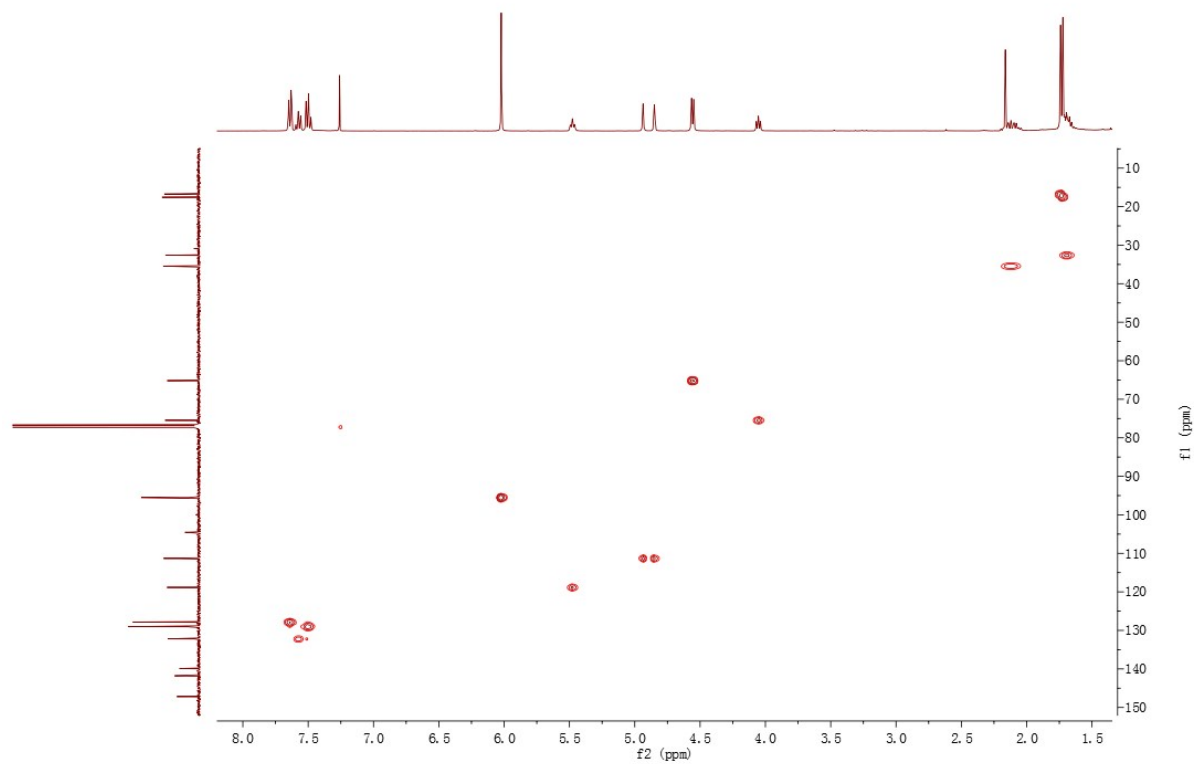

### HMBC of compound 7

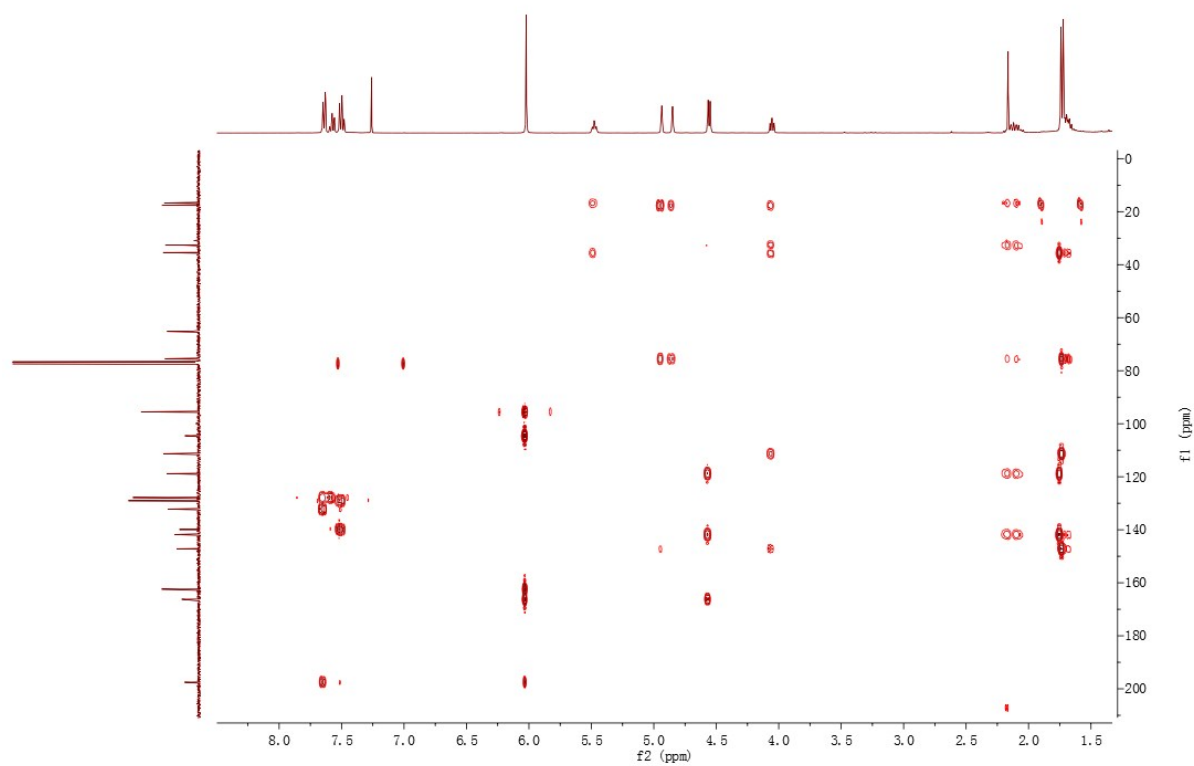

# $^1\text{H}$ - $^1\text{H}$ COSY of compound 1

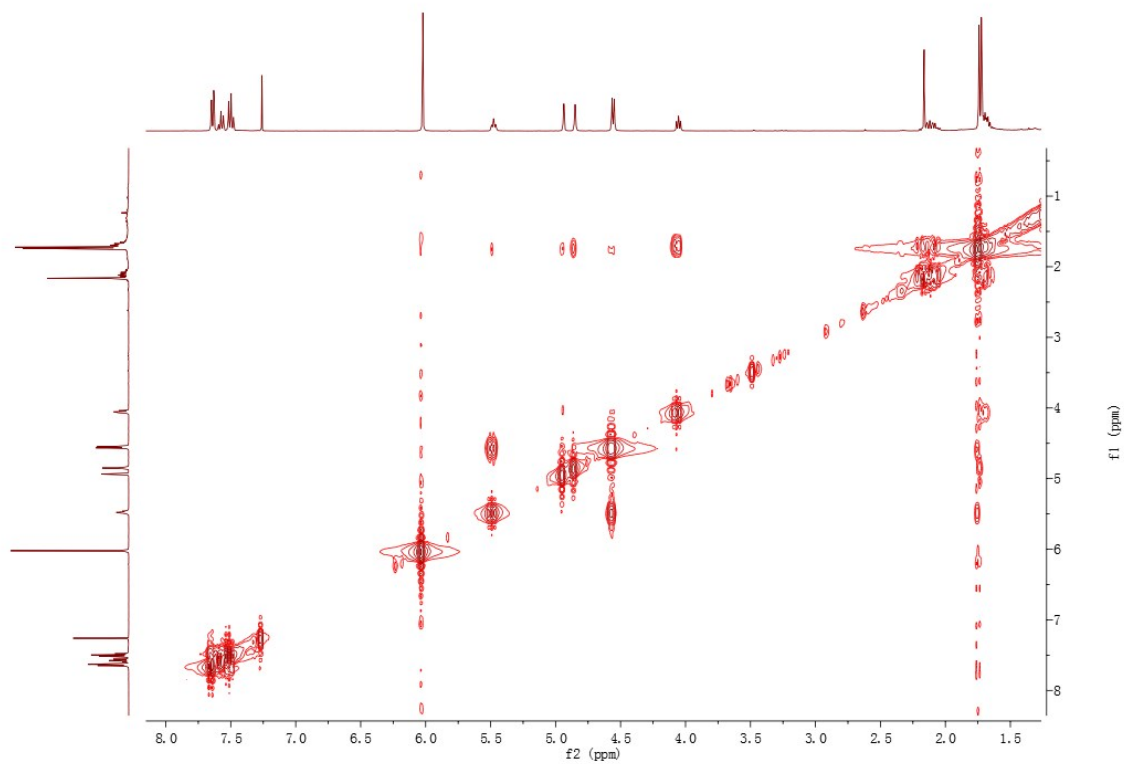

Supplement: c6ra17885e1.pdf [file c6ra17885e1.pdf]
